# Supplementary material for: Gene Expression Profile at the Motor Endplate of the Neuromuscular Junction of Fast-Twitch Muscle
Source: Front Mol Neurosci. 2020 Sep 8;13:154. doi: 10.3389/fnmol.2020.00154 (PMC7549434; doi:10.3389/fnmol.2020.00154)
Supplement: TABLE S5 — Detailed values of RNA-seq analysis. TPM of 22,382 genes in input RNA and IP RNA. Results of GSEA analysis of two KEGG gene sets and five our own gene sets that were enriched at the motor endplate of TA muscle. [file Table_5.xlsx]

## Sheet: TPM
ENSEMBL Gene ID	Gene Name	Input RNA (TPM)	IP RNA (TPM)
ENSMUSG00000013622	0610007C21Rik	66.46	66.55
ENSMUSG00000053094	0610007L01Rik	15.09	13.52
ENSMUSG00000021470	0610007P08Rik	4.81	18.21
ENSMUSG00000021252	0610007P14Rik	1.86	4.79
ENSMUSG00000015126	0610007P22Rik	21.61	53.96
ENSMUSG00000007777	0610009B22Rik	25.49	21.65
ENSMUSG00000037361	0610009D07Rik	13.76	23.76
ENSMUSG00000043644	0610009L18Rik	64.61	29.45
ENSMUSG00000024442	0610009O20Rik	17.75	22.11
ENSMUSG00000042208	0610010F05Rik	2.98	13.8
ENSMUSG00000020831	0610010K14Rik	34.22	22.15
ENSMUSG00000046727	0610010O12Rik	280.77	248.56
ENSMUSG00000025731	0610011F06Rik	41.39	33.86
ENSMUSG00000027628	0610011L14Rik	7.56	6.27
ENSMUSG00000055312	0610012H03Rik	0	0
ENSMUSG00000058706	0610030E20Rik	1	2.58
ENSMUSG00000001418	0610031J06Rik	20.69	14.01
ENSMUSG00000028608	0610037L13Rik	38.96	55.95
ENSMUSG00000022677	0610037P05Rik	46.8	32.89
ENSMUSG00000058812	0610039K10Rik	0	0
ENSMUSG00000060512	0610040J01Rik	3.66	0.52
ENSMUSG00000050552	0910001L09Rik	85.82	173.23
ENSMUSG00000051748	1100001G20Rik	1.13	1.48
ENSMUSG00000062691	1110001A16Rik	18.35	12.89
ENSMUSG00000019689	1110001J03Rik	306.9	279.65
ENSMUSG00000044408	1110002B05Rik	18.62	29.27
ENSMUSG00000090066	1110002E22Rik	8.11	14.84
ENSMUSG00000071456	1110002L01Rik	0.55	2.92
ENSMUSG00000046909	1110002N22Rik	14.21	18.93
ENSMUSG00000037822	1110003E01Rik	12.04	26.88
ENSMUSG00000022972	1110004E09Rik	27.59	22.99
ENSMUSG00000030663	1110004F10Rik	25.9	15.41
ENSMUSG00000090266	1110005A03Rik	68.98	48.96
ENSMUSG00000030664	1110006G14Rik	3.92	1.61
ENSMUSG00000037960	1110007C09Rik	63.1	66.43
ENSMUSG00000046119	1110008E08Rik	0	0
ENSMUSG00000027637	1110008F13Rik	81.14	34.74
ENSMUSG00000029600	1110008J03Rik	4.23	6.33
ENSMUSG00000021023	1110008L16Rik	2.42	0.81
ENSMUSG00000039195	1110008P14Rik	53.84	27.34
ENSMUSG00000052105	1110012J17Rik	0.41	2.37
ENSMUSG00000045237	1110012L19Rik	16.9	9.93
ENSMUSG00000024797	1110014N23Rik	14.39	58.35
ENSMUSG00000028441	1110017D15Rik	0	1.51
ENSMUSG00000075420	1110017F19Rik	0.08	0
ENSMUSG00000042350	1110018G07Rik	1.68	3.29
ENSMUSG00000021482	1110018J18Rik	7.07	16.43
ENSMUSG00000022253	1110020G09Rik	6.07	23.87
ENSMUSG00000024018	1110021J02Rik	2.02	4.7
ENSMUSG00000037455	1110021L09Rik	0.29	1.68
ENSMUSG00000068073	1110025L11Rik	0	0
ENSMUSG00000026004	1110028C15Rik	1.76	11.66
ENSMUSG00000025169	1110031I02Rik	9.37	5.02
ENSMUSG00000037971	1110032A03Rik	11.59	6.25
ENSMUSG00000043461	1110032A04Rik	0	0
ENSMUSG00000046999	1110032F04Rik	0	0
ENSMUSG00000020973	1110034A24Rik	1.28	1.23
ENSMUSG00000048495	1110034B05Rik	2.45	17.6
ENSMUSG00000044991	1110034G24Rik	5.01	7.79
ENSMUSG00000040720	1110037F02Rik	0.86	11.2
ENSMUSG00000033416	1110038D17Rik	14.16	23.98
ENSMUSG00000063236	1110038F14Rik	17.08	55.35
ENSMUSG00000028669	1110049F12Rik	16.95	10.53
ENSMUSG00000040591	1110051M20Rik	12.34	33.19
ENSMUSG00000038544	1110054O05Rik	0.74	1.3
ENSMUSG00000037669	1110057K04Rik	1.29	9.53
ENSMUSG00000068067	1110057P08Rik	0	0
ENSMUSG00000026154	1110058L19Rik	56.85	72.77
ENSMUSG00000035171	1110059E24Rik	3.88	8.14
ENSMUSG00000032551	1110059G10Rik	4.85	4.73
ENSMUSG00000037086	1110059M19Rik	0	0
ENSMUSG00000078570	1110065P20Rik	30.6	3.2
ENSMUSG00000042363	1110067D22Rik	10.43	6.37
ENSMUSG00000022018	1190002H23Rik	41.92	44.2
ENSMUSG00000045414	1190002N15Rik	0.48	4.52
ENSMUSG00000025481	1190003J15Rik	0.25	0
ENSMUSG00000053286	1190005F20Rik	3.73	29.57
ENSMUSG00000043687	1190005I06Rik	0.91	1.29
ENSMUSG00000063320	1190007I07Rik	43.95	18.38
ENSMUSG00000021280	1200009I06Rik	0.45	1.72
ENSMUSG00000022008	1200011I18Rik	0.94	3.04
ENSMUSG00000020495	1200011M11Rik	1.67	0.19
ENSMUSG00000020783	1200014J11Rik	2.38	21.27
ENSMUSG00000052748	1200016B10Rik	0.44	26.43
ENSMUSG00000020741	1300001I01Rik	13.31	56.37
ENSMUSG00000028327	1300002K09Rik	0	0
ENSMUSG00000058997	1300010F03Rik	5.22	13.24
ENSMUSG00000021411	1300014I06Rik	1.08	2.65
ENSMUSG00000033688	1300017J02Rik	0	0
ENSMUSG00000001062	1300018I17Rik	4.74	7.14
ENSMUSG00000035757	1300018J18Rik	5.29	3.22
ENSMUSG00000030316	1500001M20Rik	4	8.33
ENSMUSG00000073681	1500002C15Rik	0	0
ENSMUSG00000002210	1500002O20Rik	5.04	29.76
ENSMUSG00000014077	1500003O03Rik	22.29	19.15
ENSMUSG00000068099	1500009C09Rik	0	0
ENSMUSG00000087651	1500009L16Rik	0.19	0.09
ENSMUSG00000020898	1500010J02Rik	5.59	32.93
ENSMUSG00000072694	1500011B03Rik	0.74	6.38
ENSMUSG00000092279	1500011B03Rik	0.34	0
ENSMUSG00000029463	1500011H22Rik	0.94	6.27
ENSMUSG00000074578	1500012F01Rik	25.36	35.25
ENSMUSG00000026051	1500015O10Rik	1.48	1.44
ENSMUSG00000035790	1500031L02Rik	6.36	5.42
ENSMUSG00000022452	1500032L24Rik	296.19	256.28
ENSMUSG00000059631	1500035N22Rik	0	0
ENSMUSG00000028701	1520402A15Rik	0.73	0.26
ENSMUSG00000024118	1600002H07Rik	0.89	1.35
ENSMUSG00000035595	1600002K03Rik	8.85	70.63
ENSMUSG00000075054	1600012F09Rik	3.87	2.53
ENSMUSG00000050088	1600012H06Rik	2.01	5.39
ENSMUSG00000047661	1600012P17Rik	0	0
ENSMUSG00000054676	1600014C10Rik	8.59	10.26
ENSMUSG00000035491	1600014K23Rik	0	0
ENSMUSG00000029813	1600015I10Rik	0	0
ENSMUSG00000025500	1600016N20Rik	0	0
ENSMUSG00000051065	1600021P15Rik	2.27	1.21
ENSMUSG00000027569	1600027N09Rik	1.67	8.9
ENSMUSG00000032068	1600029D21Rik	0.12	0
ENSMUSG00000046242	1600029I14Rik	0	0
ENSMUSG00000057818	1600029O15Rik	0	0
ENSMUSG00000029182	1700001C02Rik	0	0
ENSMUSG00000047150	1700001C19Rik	0	0
ENSMUSG00000072603	1700001F09Rik	0	0
ENSMUSG00000044744	1700001G17Rik	0	0
ENSMUSG00000066639	1700001J11Rik	0	0
ENSMUSG00000056508	1700001K19Rik	0	0.12
ENSMUSG00000075511	1700001L05Rik	0.09	0.25
ENSMUSG00000021534	1700001L19Rik	0	0
ENSMUSG00000044320	1700001O22Rik	4.93	0
ENSMUSG00000018543	1700001P01Rik	0	0
ENSMUSG00000030030	1700003E16Rik	0	0
ENSMUSG00000067647	1700003E24Rik	0	0
ENSMUSG00000038523	1700003F12Rik	0	1.14
ENSMUSG00000039174	1700003H04Rik	0	0
ENSMUSG00000028294	1700003M02Rik	0	0
ENSMUSG00000027973	1700006A11Rik	0	0
ENSMUSG00000010841	1700006E09Rik	0	0
ENSMUSG00000031620	1700007B14Rik	0.04	0.36
ENSMUSG00000057816	1700007G11Rik	0	0
ENSMUSG00000078129	1700007I08Rik	0	0
ENSMUSG00000030858	1700007K09Rik	0	0
ENSMUSG00000026831	1700007K13Rik	0.28	0
ENSMUSG00000020270	1700008A04Rik	0	0
ENSMUSG00000056018	1700008F21Rik	0	0
ENSMUSG00000058252	1700008I05Rik	0	0
ENSMUSG00000008028	1700008O03Rik	0	0
ENSMUSG00000069118	1700008P02Rik	0	0
ENSMUSG00000055826	1700008P20Rik	0.09	2.41
ENSMUSG00000028287	1700009N14Rik	0	0
ENSMUSG00000026649	1700009P17Rik	1.85	1.68
ENSMUSG00000057047	1700010B08Rik	0	0
ENSMUSG00000071721	1700010D01Rik	0	0
ENSMUSG00000067101	1700010H22Rik	0	0
ENSMUSG00000023873	1700010I14Rik	0.05	0
ENSMUSG00000030636	1700010L04Rik	0	0
ENSMUSG00000027431	1700010M22Rik	0	0
ENSMUSG00000063971	1700011A15Rik	0	0
ENSMUSG00000036557	1700011E24Rik	0	0
ENSMUSG00000051896	1700011F03Rik	0	0
ENSMUSG00000025090	1700011F14Rik	0	0
ENSMUSG00000021850	1700011H14Rik	0	0
ENSMUSG00000058925	1700011I03Rik	0.1	0
ENSMUSG00000031682	1700011L22Rik	0	0.12
ENSMUSG00000079476	1700011M02Rik	0	0
ENSMUSG00000029766	1700012A03Rik	0	0
ENSMUSG00000042708	1700012A16Rik	0	0
ENSMUSG00000020617	1700012B07Rik	0	0
ENSMUSG00000031927	1700012B09Rik	0	0
ENSMUSG00000079179	1700012B15Rik	1.12	2.6
ENSMUSG00000078347	1700012L04Rik	1.97	1.42
ENSMUSG00000028589	1700012P22Rik	0	0
ENSMUSG00000079346	1700013D24Rik	0	0
ENSMUSG00000027886	1700013F07Rik	0	0.34
ENSMUSG00000041399	1700013G24Rik	0	0
ENSMUSG00000054727	1700013H16Rik	0	0
ENSMUSG00000063447	1700013N18Rik	0	0
ENSMUSG00000051054	1700014D04Rik	0	0
ENSMUSG00000048155	1700014N06Rik	0	0
ENSMUSG00000042800	1700015E13Rik	0.11	0
ENSMUSG00000079666	1700015F17Rik	0	0
ENSMUSG00000015962	1700016C15Rik	0.69	0.17
ENSMUSG00000031509	1700016D06Rik	0	0
ENSMUSG00000029320	1700016H13Rik	0	0
ENSMUSG00000053783	1700016K19Rik	0	0
ENSMUSG00000022603	1700016M24Rik	0	0
ENSMUSG00000032300	1700017B05Rik	0.27	1.37
ENSMUSG00000024729	1700017D01Rik	0	0
ENSMUSG00000037884	1700017G19Rik	0	0
ENSMUSG00000056912	1700017N19Rik	0	0
ENSMUSG00000033993	1700018A14Rik	0	0
ENSMUSG00000031809	1700018B08Rik	0	0
ENSMUSG00000037910	1700018B24Rik	0	0
ENSMUSG00000058935	1700018C11Rik	0	0
ENSMUSG00000029620	1700018F24Rik	0	0
ENSMUSG00000031512	1700018L24Rik	0	0
ENSMUSG00000060715	1700019A02Rik	0	0
ENSMUSG00000040340	1700019B03Rik	0.05	0
ENSMUSG00000043629	1700019D03Rik	0.1	0.05
ENSMUSG00000007867	1700019E19Rik	9.04	18.32
ENSMUSG00000030623	1700019G06Rik	0	0
ENSMUSG00000068299	1700019G17Rik	0.07	0.66
ENSMUSG00000038987	1700019L03Rik	0.08	0
ENSMUSG00000059695	1700019M22Rik	0	0
ENSMUSG00000050623	1700019N12Rik	0.11	0
ENSMUSG00000026931	1700019N19Rik	0	0
ENSMUSG00000027409	1700020A23Rik	0	0
ENSMUSG00000017767	1700020C07Rik	0	0
ENSMUSG00000035085	1700020L24Rik	0.14	0
ENSMUSG00000050844	1700020N01Rik	0	0
ENSMUSG00000059690	1700020N15Rik	0	0
ENSMUSG00000021254	1700020O03Rik	0.52	0.96
ENSMUSG00000037535	1700021A07Rik	0	0
ENSMUSG00000010538	1700021C14Rik	6.89	8.37
ENSMUSG00000019797	1700021F05Rik	112.37	137.66
ENSMUSG00000027518	1700021F07Rik	0	0
ENSMUSG00000035629	1700021K19Rik	3.84	31.96
ENSMUSG00000079528	1700021O21Rik	0	0
ENSMUSG00000028451	1700022I11Rik	0.08	0
ENSMUSG00000057072	1700022P22Rik	0	0
ENSMUSG00000030292	1700023A16Rik	0	0.08
ENSMUSG00000029248	1700023E05Rik	0	0
ENSMUSG00000020940	1700023F06Rik	0	0
ENSMUSG00000052334	1700024B05Rik	0	0
ENSMUSG00000072473	1700024G13Rik	0	0
ENSMUSG00000091154	1700024N20Rik	3.76	0.71
ENSMUSG00000045022	1700024P04Rik	0	0
ENSMUSG00000078612	1700024P16Rik	0	0
ENSMUSG00000078935	1700025C18Rik	0	0
ENSMUSG00000029784	1700025E21Rik	0.2	0
ENSMUSG00000024728	1700025F22Rik	0	0
ENSMUSG00000032666	1700025G04Rik	13.42	14.65
ENSMUSG00000051736	1700025K23Rik	4.4	10.47
ENSMUSG00000011154	1700026D08Rik	0	0
ENSMUSG00000021414	1700026J04Rik	0	0
ENSMUSG00000026809	1700026L06Rik	0.14	0
ENSMUSG00000010136	1700027A23Rik	0.27	1.68
ENSMUSG00000009115	1700027D21Rik	0	0.23
ENSMUSG00000056821	1700028I16Rik	0	0
ENSMUSG00000038782	1700028J19Rik	0.12	0
ENSMUSG00000089798	1700028K03Rik	0	0.03
ENSMUSG00000033053	1700028P14Rik	0	0
ENSMUSG00000026049	1700029F09Rik	0.72	1.45
ENSMUSG00000052075	1700029F12Rik	0	0
ENSMUSG00000073758	1700029G01Rik	0.23	0.1
ENSMUSG00000031452	1700029H14Rik	0	0
ENSMUSG00000044916	1700029I15Rik	0.41	0
ENSMUSG00000071103	1700029J07Rik	0.23	14.45
ENSMUSG00000027505	1700029J11Rik	0	0
ENSMUSG00000061633	1700029P11Rik	0	0
ENSMUSG00000091071	1700030C10Rik	0	0
ENSMUSG00000045350	1700030F18Rik	0.31	1.4
ENSMUSG00000031847	1700030J22Rik	0.02	0
ENSMUSG00000052794	1700030K09Rik	1.15	4.94
ENSMUSG00000032894	1700031F05Rik	0	0
ENSMUSG00000024532	1700034E13Rik	0	0.48
ENSMUSG00000020461	1700034F02Rik	0	0
ENSMUSG00000024645	1700034H14Rik	11.21	15.65
ENSMUSG00000055833	1700034H15Rik	0	0.12
ENSMUSG00000074619	1700034I23Rik	0.06	0.2
ENSMUSG00000050325	1700034J04Rik	0	0
ENSMUSG00000040163	1700034J05Rik	0	0
ENSMUSG00000029867	1700034O15Rik	0	0
ENSMUSG00000052481	1700036A12Rik	0	0
ENSMUSG00000005983	1700037C18Rik	2.99	2.16
ENSMUSG00000027327	1700037H04Rik	3.18	3.49
ENSMUSG00000070568	1700039E15Rik	0	0
ENSMUSG00000030008	1700040I03Rik	15.8	2.15
ENSMUSG00000019945	1700040L02Rik	0.12	0.42
ENSMUSG00000054822	1700041G16Rik	0	0
ENSMUSG00000057402	1700042B14Rik	0	0
ENSMUSG00000078593	1700042G07Rik	0	0
ENSMUSG00000091473	1700045I11Rik	0	0
ENSMUSG00000053206	1700047G07Rik	0	0
ENSMUSG00000034953	1700047I17Rik2	0.88	1.6
ENSMUSG00000043773	1700048O20Rik	0	0
ENSMUSG00000079271	1700049E17Rik1	0	0
ENSMUSG00000072613	1700049E17Rik2	0	0
ENSMUSG00000070709	1700049G17Rik	0.71	3.87
ENSMUSG00000061759	1700052N19Rik	5.48	5.1
ENSMUSG00000031971	1700054N08Rik	0.06	0
ENSMUSG00000040456	1700054O13Rik	0	0
ENSMUSG00000057293	1700054O19Rik	0.35	0
ENSMUSG00000070997	1700055D18Rik	0.05	0
ENSMUSG00000037263	1700055N04Rik	0	0
ENSMUSG00000044854	1700056E22Rik	1.91	4.51
ENSMUSG00000074139	1700057G04Rik	0	0
ENSMUSG00000026592	1700057K13Rik	0	0
ENSMUSG00000078957	1700060C20Rik	0	0
ENSMUSG00000024209	1700061G19Rik	0.05	0.03
ENSMUSG00000028009	1700061I17Rik	0	0
ENSMUSG00000062154	1700061J05Rik	0	0
ENSMUSG00000040657	1700063H04Rik	0	0
ENSMUSG00000082766	1700064H15Rik	0	0
ENSMUSG00000032900	1700065I17Rik	0	0
ENSMUSG00000073598	1700066B19Rik	0.11	0.7
ENSMUSG00000038323	1700066M21Rik	0.57	0.88
ENSMUSG00000046408	1700067K01Rik	0.12	0
ENSMUSG00000021545	1700067P10Rik	0	0
ENSMUSG00000053081	1700069B07Rik	0	0
ENSMUSG00000042184	1700069L16Rik	0	0
ENSMUSG00000035454	1700072E05Rik	0	0
ENSMUSG00000029883	1700074P13Rik	0	0
ENSMUSG00000032566	1700080E11Rik	0	0
ENSMUSG00000031118	1700080O16Rik	0	0
ENSMUSG00000018412	1700081L11Rik	0.87	10.68
ENSMUSG00000070532	1700084C01Rik	0	0
ENSMUSG00000058101	1700084J12Rik	0	0
ENSMUSG00000057805	1700084M14Rik	0	0
ENSMUSG00000020548	1700086D15Rik	0	0
ENSMUSG00000071265	1700086L19Rik	0	0
ENSMUSG00000033029	1700088E04Rik	0.2	0
ENSMUSG00000037689	1700090G07Rik	0	0
ENSMUSG00000090741	1700091H14Rik	0	0
ENSMUSG00000078600	1700092K14Rik	0	0
ENSMUSG00000090840	1700092M07Rik	0	0
ENSMUSG00000020286	1700093K21Rik	0	0.33
ENSMUSG00000078667	1700094D03Rik	1	5.59
ENSMUSG00000079502	1700101E01Rik	0.08	0
ENSMUSG00000074571	1700101G07Rik	0	0
ENSMUSG00000045815	1700101I19Rik	0	0
ENSMUSG00000032611	1700102P08Rik	0	4.61
ENSMUSG00000049476	1700104B16Rik	0	0
ENSMUSG00000034031	1700106J16Rik	0	0
ENSMUSG00000071037	1700106N22Rik	0	0.04
ENSMUSG00000020545	1700108M19Rik	0	0
ENSMUSG00000008307	1700109H08Rik	0	9.24
ENSMUSG00000079407	1700110I01Rik	0	0
ENSMUSG00000042888	1700110M21Rik	0	0
ENSMUSG00000029837	1700111E14Rik	0	0
ENSMUSG00000063458	1700112E06Rik	1.71	1.57
ENSMUSG00000047129	1700113H08Rik	0.43	0.16
ENSMUSG00000082488	1700119I11Rik	0	0
ENSMUSG00000045391	1700120B22Rik	0	0
ENSMUSG00000024786	1700123I01Rik	0	0
ENSMUSG00000029526	1700123K08Rik	0	0
ENSMUSG00000072878	1700123L14Rik	0.04	0
ENSMUSG00000040822	1700123O20Rik	2.44	2.49
ENSMUSG00000078554	1700125D06Rik	0	0
ENSMUSG00000018479	1700125H20Rik	0	0
ENSMUSG00000031998	1700128F08Rik	0	0
ENSMUSG00000021977	1700129C05Rik	0	0
ENSMUSG00000036372	1810006K21Rik	79.59	66.61
ENSMUSG00000032977	1810008A18Rik	3.08	7.34
ENSMUSG00000071653	1810009A15Rik	19.81	7.63
ENSMUSG00000036996	1810009J06Rik	0	0
ENSMUSG00000041707	1810011H11Rik	0	0.07
ENSMUSG00000056313	1810011O10Rik	4.79	5.61
ENSMUSG00000072640	1810012P15Rik	9.75	2.46
ENSMUSG00000061461	1810013D10Rik	86.48	78.76
ENSMUSG00000022507	1810013L24Rik	5.21	7.18
ENSMUSG00000025466	1810014F10Rik	56.99	166.24
ENSMUSG00000037600	1810019J16Rik	0	2.17
ENSMUSG00000035642	1810020D17Rik	188.2	268.7
ENSMUSG00000078784	1810022K09Rik	19.19	19.38
ENSMUSG00000044145	1810024B03Rik	0.74	0.28
ENSMUSG00000048429	1810026J23Rik	14.6	13.16
ENSMUSG00000070394	1810027O10Rik	366.17	556.44
ENSMUSG00000025591	1810029B16Rik	8.59	4.36
ENSMUSG00000026531	1810030J14Rik	0	0
ENSMUSG00000028295	1810030N24Rik	36.24	70.27
ENSMUSG00000044148	1810030O07Rik	2.98	16.6
ENSMUSG00000033159	1810031K17Rik	4.83	20.6
ENSMUSG00000020812	1810032O08Rik	0.54	4.12
ENSMUSG00000013974	1810033B17Rik	0	0
ENSMUSG00000021040	1810035L17Rik	49.99	158.5
ENSMUSG00000054091	1810037I17Rik	36.39	119.74
ENSMUSG00000062760	1810041L15Rik	0.03	0.25
ENSMUSG00000020284	1810043G02Rik	2.83	7.58
ENSMUSG00000078572	1810043H04Rik	53.7	147.44
ENSMUSG00000002580	1810046J19Rik	44.64	82.07
ENSMUSG00000036027	1810046K07Rik	0	0
ENSMUSG00000034501	1810048J11Rik	0.61	0.48
ENSMUSG00000039670	1810049H13Rik	28.29	8.85
ENSMUSG00000035372	1810055G02Rik	1.15	0.56
ENSMUSG00000027713	1810062G17Rik	0	0
ENSMUSG00000051671	1810063B05Rik	25.64	11.39
ENSMUSG00000045107	1810063B07Rik	5.65	6.67
ENSMUSG00000090925	1810064F22Rik	0	0
ENSMUSG00000013653	1810065E05Rik	0	0
ENSMUSG00000040359	1810074P20Rik	1.61	28.12
ENSMUSG00000039339	2010001E11Rik	0	0
ENSMUSG00000024353	2010001M09Rik	0.09	0
ENSMUSG00000067297	2010002M12Rik	0	0
ENSMUSG00000038059	2010002N04Rik	0.68	0.43
ENSMUSG00000042041	2010003K11Rik	0	0
ENSMUSG00000051949	2010005H15Rik	0	0
ENSMUSG00000044694	2010007H06Rik	0	0
ENSMUSG00000027495	2010011I20Rik	1.73	1.21
ENSMUSG00000062376	2010012O05Rik	4.49	12.29
ENSMUSG00000042233	2010015L04Rik	0.3	0
ENSMUSG00000091575	2010016I18Rik	0	0
ENSMUSG00000025528	2010106E10Rik	0	0
ENSMUSG00000027366	2010106G01Rik	6.29	11.79
ENSMUSG00000021290	2010107E04Rik	2443.23	3549.6
ENSMUSG00000029847	2010107G12Rik	0.14	0
ENSMUSG00000020083	2010107G23Rik	0.28	0
ENSMUSG00000058351	2010107H07Rik	55.81	45.31
ENSMUSG00000029384	2010109A12Rik	0	0
ENSMUSG00000063522	2010109I03Rik	0	0.15
ENSMUSG00000090946	2010109K11Rik	0.62	1.1
ENSMUSG00000030865	2010110P09Rik	0.31	1.74
ENSMUSG00000021458	2010111I01Rik	7.32	16.51
ENSMUSG00000026090	2010300C02Rik	0	0.58
ENSMUSG00000048351	2010305A19Rik	10.14	7.04
ENSMUSG00000026955	2010317E24Rik	0.02	0
ENSMUSG00000034263	2010321M09Rik	2.84	5.6
ENSMUSG00000030587	2200002D01Rik	2.16	3.95
ENSMUSG00000013083	2200002J24Rik	0	0
ENSMUSG00000031937	2200002K05Rik	0	0.39
ENSMUSG00000027281	2210009G21Rik	0.1	0.61
ENSMUSG00000029882	2210010C04Rik	0	0
ENSMUSG00000040498	2210010C17Rik	0	0
ENSMUSG00000074217	2210011C24Rik	4.89	6.91
ENSMUSG00000028619	2210012G02Rik	0.75	3.67
ENSMUSG00000021550	2210016F16Rik	4.95	3.83
ENSMUSG00000029559	2210016L21Rik	6.96	6.1
ENSMUSG00000035401	2210018M11Rik	0.84	20.73
ENSMUSG00000064284	2210021J22Rik	22.3	11.25
ENSMUSG00000036552	2210404J11Rik	1.58	8.86
ENSMUSG00000078439	2210404O07Rik	0.09	0.61
ENSMUSG00000078546	2210404O09Rik	0	0
ENSMUSG00000037145	2210407C18Rik	0	0
ENSMUSG00000071252	2210408I21Rik	0.18	0.63
ENSMUSG00000030431	2210411K11Rik	3.23	0.35
ENSMUSG00000013643	2210415F13Rik	0	0
ENSMUSG00000078894	2210418O10Rik	0.84	13.18
ENSMUSG00000039269	2300002M23Rik	0	0
ENSMUSG00000078257	2300003K06Rik	0	0
ENSMUSG00000075605	2300005B03Rik	0.25	0
ENSMUSG00000032403	2300009A05Rik	25.26	7.32
ENSMUSG00000033096	2310001A20Rik	9.32	12.17
ENSMUSG00000074433	2310001H18Rik	0	0
ENSMUSG00000053353	2310001K24Rik	2.22	0
ENSMUSG00000036731	2310002J15Rik	0.1	0
ENSMUSG00000028396	2310002L09Rik	113.07	97.64
ENSMUSG00000024512	2310002L13Rik	0	0
ENSMUSG00000027573	2310003C23Rik	10.66	10.27
ENSMUSG00000027245	2310003F16Rik	14.36	119.48
ENSMUSG00000025384	2310003H01Rik	2.81	6.79
ENSMUSG00000007457	2310003L06Rik	0	0
ENSMUSG00000027384	2310003L22Rik	34.79	28.03
ENSMUSG00000020910	2310004I24Rik	3.03	30.38
ENSMUSG00000020778	2310004N24Rik	18.11	18.85
ENSMUSG00000046748	2310005G13Rik	0	0
ENSMUSG00000087230	2310006M14Rik	0	0
ENSMUSG00000034159	2310007B03Rik	0	0
ENSMUSG00000009210	2310007L24Rik	2.87	9.36
ENSMUSG00000041974	2310008H04Rik	0.14	2.77
ENSMUSG00000030980	2310008H09Rik	2.11	15.29
ENSMUSG00000079283	2310009B15Rik	34.37	21.01
ENSMUSG00000046345	2310010M20Rik	33.28	27.39
ENSMUSG00000020133	2310011J03Rik	6.66	1.86
ENSMUSG00000033967	2310014L17Rik	0.04	0
ENSMUSG00000019933	2310015B20Rik	248.43	548.6
ENSMUSG00000070574	2310016G11Rik	0.38	0.68
ENSMUSG00000023020	2310016M24Rik	326.73	751.95
ENSMUSG00000021819	2310021P13Rik	1.76	8.11
ENSMUSG00000049643	2310022A10Rik	25.21	41.85
ENSMUSG00000031983	2310022B05Rik	4.29	4.81
ENSMUSG00000028439	2310028H24Rik	5	2.11
ENSMUSG00000032062	2310030G06Rik	2.85	0.85
ENSMUSG00000050323	2310030N02Rik	31.07	38.23
ENSMUSG00000011632	2310033E01Rik	0	0
ENSMUSG00000020441	2310033P09Rik	1.25	13.75
ENSMUSG00000026319	2310035C23Rik	0.65	9.82
ENSMUSG00000068264	2310035K24Rik	10.16	2.54
ENSMUSG00000041203	2310036O22Rik	52.66	52.89
ENSMUSG00000022992	2310037I24Rik	20.88	72.73
ENSMUSG00000062619	2310039H08Rik	56.18	61.79
ENSMUSG00000078486	2310042D19Rik	52.48	111.72
ENSMUSG00000006143	2310043J07Rik	0	0
ENSMUSG00000034157	2310044G17Rik	8.67	25.2
ENSMUSG00000008140	2310044H10Rik	35.79	26.97
ENSMUSG00000002345	2310045N01Rik	8.92	6.17
ENSMUSG00000032355	2310046A06Rik	22.81	27.84
ENSMUSG00000032305	2310046O06Rik	3.15	10.89
ENSMUSG00000051238	2310047B19Rik	1.25	0.05
ENSMUSG00000045176	2310047M10Rik	13.19	10.21
ENSMUSG00000090314	2310050C09Rik	0.45	0.21
ENSMUSG00000015519	2310057J18Rik	0	0
ENSMUSG00000040177	2310057M21Rik	4.5	12.64
ENSMUSG00000048830	2310057N15Rik	0	0
ENSMUSG00000014633	2310061C15Rik	38.44	126.33
ENSMUSG00000050705	2310061I04Rik	80.28	56.87
ENSMUSG00000050704	2310061N02Rik	0	0
ENSMUSG00000020747	2310067B10Rik	7.72	34.47
ENSMUSG00000029097	2310079F23Rik	0.15	0.69
ENSMUSG00000045331	2310079G19Rik	0	0
ENSMUSG00000030842	2400001E08Rik	90.83	54.43
ENSMUSG00000031729	2400003C14Rik	10.57	60.59
ENSMUSG00000027502	2410001C21Rik	14.38	17.48
ENSMUSG00000045411	2410002F23Rik	1.88	7.83
ENSMUSG00000025377	2410002I01Rik	1.85	24.84
ENSMUSG00000021711	2410002O22Rik	3.62	2.26
ENSMUSG00000078936	2410002O22Rik	0.07	0.03
ENSMUSG00000029815	2410003K15Rik	79.08	10.95
ENSMUSG00000092622	2410004A20Rik	0	0
ENSMUSG00000036873	2410004B18Rik	13.51	13.23
ENSMUSG00000071398	2410004P03Rik	0	0
ENSMUSG00000090470	2410012M07Rik	0	0
ENSMUSG00000049760	2410015M20Rik	72.53	70.36
ENSMUSG00000046791	2410016O06Rik	0.87	1.32
ENSMUSG00000038311	2410017I17Rik	0	0
ENSMUSG00000073240	2410017P09Rik	13.81	14.96
ENSMUSG00000034173	2410018M08Rik	2.82	0.75
ENSMUSG00000031458	2410022L05Rik	13.36	17.83
ENSMUSG00000027132	2410042D21Rik	0.31	1.58
ENSMUSG00000038065	2410066E13Rik	0.81	2.59
ENSMUSG00000074269	2410076I21Rik	0	0
ENSMUSG00000039801	2410089E03Rik	0.1	17.01
ENSMUSG00000024082	2410091C18Rik	6.57	3.22
ENSMUSG00000051297	2410124H12Rik	0	0
ENSMUSG00000024726	2410127L17Rik	36.44	95.8
ENSMUSG00000032840	2410131K14Rik	1.29	2.79
ENSMUSG00000064308	2410137M14Rik	0.12	0.83
ENSMUSG00000074832	2410141K09Rik	0	0
ENSMUSG00000001017	2500003M10Rik	37.03	53.37
ENSMUSG00000071632	2510002D24Rik	10.31	22.18
ENSMUSG00000036955	2510003E04Rik	9.29	5.5
ENSMUSG00000028797	2510006D16Rik	21.84	16.95
ENSMUSG00000043391	2510009E07Rik	3.97	11.51
ENSMUSG00000034889	2510012J08Rik	2.16	2.63
ENSMUSG00000044496	2510039O18Rik	4.85	5.01
ENSMUSG00000066175	2510046G10Rik	2.26	0
ENSMUSG00000068011	2510049J12Rik	0.2	0.23
ENSMUSG00000039798	2600006K01Rik	0	0
ENSMUSG00000052419	2610001J05Rik	25.55	38.69
ENSMUSG00000078521	2610002D18Rik	0	0
ENSMUSG00000054836	2610002I17Rik	1.93	2.59
ENSMUSG00000073684	2610002J02Rik	2.58	9.38
ENSMUSG00000031242	2610002M06Rik	0.57	2.19
ENSMUSG00000060301	2610008E11Rik	1.99	12.05
ENSMUSG00000022701	2610015P09Rik	0.61	50.81
ENSMUSG00000031112	2610018G03Rik	0.06	1.03
ENSMUSG00000050052	2610019F03Rik	3.35	0.49
ENSMUSG00000030924	2610020H08Rik	0.03	1.01
ENSMUSG00000091474	2610021A01Rik	0.54	5.61
ENSMUSG00000021176	2610021K21Rik	0.03	0
ENSMUSG00000019297	2610027L16Rik	2.48	2.88
ENSMUSG00000009114	2610028H24Rik	0.14	0
ENSMUSG00000031226	2610029G23Rik	3.55	3.12
ENSMUSG00000028251	2610029I01Rik	11.27	7.4
ENSMUSG00000039043	2610034B18Rik	0.93	1.94
ENSMUSG00000024227	2610034M16Rik	0.49	0
ENSMUSG00000022978	2610039C10Rik	0.74	3.89
ENSMUSG00000079388	2610042L04Rik	0	0
ENSMUSG00000066057	2610044O15Rik	0.35	0
ENSMUSG00000032407	2610101N10Rik	1.15	57.55
ENSMUSG00000029005	2610109H07Rik	0.03	0.1
ENSMUSG00000074415	2610203C20Rik	0.27	3.89
ENSMUSG00000079671	2610203C22Rik	0.17	1.61
ENSMUSG00000059482	2610301B20Rik	1.25	3.16
ENSMUSG00000033712	2610301G19Rik	2.3	7.11
ENSMUSG00000046995	2610303G11Rik	0	0
ENSMUSG00000066000	2610305D13Rik	0.19	0.89
ENSMUSG00000049916	2610318N02Rik	0.06	0
ENSMUSG00000010277	2610507B11Rik	26.53	69.85
ENSMUSG00000092486	2610524H06Rik	0.09	0.12
ENSMUSG00000022748	2610528E23Rik	23.48	16.84
ENSMUSG00000028536	2610528J11Rik	0	0
ENSMUSG00000027122	2700007P21Rik	1.43	3.13
ENSMUSG00000038005	2700029M09Rik	7.48	27.56
ENSMUSG00000041789	2700046A07Rik	0	0
ENSMUSG00000034601	2700049A03Rik	0.71	20.89
ENSMUSG00000039990	2700050L05Rik	2.62	59.94
ENSMUSG00000021807	2700060E02Rik	101.42	49.89
ENSMUSG00000024273	2700062C07Rik	1.69	1.07
ENSMUSG00000021041	2700073G19Rik	0	4.74
ENSMUSG00000033417	2700078E11Rik	3.6	7.92
ENSMUSG00000053080	2700081O15Rik	0.66	3.55
ENSMUSG00000072704	2700089E24Rik	63.07	74.09
ENSMUSG00000076437	2700094K13Rik	28.27	27.87
ENSMUSG00000062198	2700097O09Rik	3.13	7.08
ENSMUSG00000037787	2810002N01Rik	51.95	38.46
ENSMUSG00000031984	2810004N23Rik	12.81	24.83
ENSMUSG00000047635	2810006K23Rik	2.75	0.59
ENSMUSG00000030378	2810007J24Rik	0	0
ENSMUSG00000071180	2810008M24Rik	4.52	9.05
ENSMUSG00000012429	2810021B07Rik	2.98	3.68
ENSMUSG00000020491	2810021J22Rik	0.12	0.83
ENSMUSG00000049881	2810025M15Rik	5.78	9.31
ENSMUSG00000054074	2810030E01Rik	0.02	0
ENSMUSG00000037735	2810032G03Rik	0.13	0
ENSMUSG00000049504	2810046L04Rik	0.81	4.34
ENSMUSG00000019718	2810055F11Rik	0.2	0.32
ENSMUSG00000052450	2810055G20Rik	0.05	7.52
ENSMUSG00000090386	2810055G20Rik	0.1	0.1
ENSMUSG00000028060	2810403A07Rik	1.97	20.38
ENSMUSG00000029059	2810405K02Rik	225.65	239.35
ENSMUSG00000055972	2810407A14Rik	0	0
ENSMUSG00000075700	2810407C02Rik	46.98	60.17
ENSMUSG00000018570	2810408A11Rik	0.15	0
ENSMUSG00000039725	2810408M09Rik	4.16	6.08
ENSMUSG00000040204	2810417H13Rik	0.26	0.77
ENSMUSG00000055553	2810422J05Rik	67.99	45.35
ENSMUSG00000041396	2810422O20Rik	1.96	2.59
ENSMUSG00000058833	2810428I15Rik	258.29	234.57
ENSMUSG00000036114	2810432D09Rik	48.59	76.73
ENSMUSG00000039611	2810432L12Rik	7.9	6.36
ENSMUSG00000048910	2810453I06Rik	0	0
ENSMUSG00000083012	2810453I06Rik	40.07	27.58
ENSMUSG00000026227	2810459M11Rik	0	0
ENSMUSG00000032712	2810474O19Rik	0.47	6.51
ENSMUSG00000057265	2900006K08Rik	0.39	1.6
ENSMUSG00000024208	2900010M23Rik	659.88	463.45
ENSMUSG00000044117	2900011O08Rik	0	0
ENSMUSG00000051339	2900026A02Rik	3.22	7.26
ENSMUSG00000071860	2900055J20Rik	0	0
ENSMUSG00000073596	2900060B14Rik	0	0
ENSMUSG00000055943	2900064A13Rik	7.04	4.46
ENSMUSG00000030385	2900092C05Rik	0	0
ENSMUSG00000030680	2900092E17Rik	4.1	3.68
ENSMUSG00000067833	2900097C17Rik	0.19	0
ENSMUSG00000020381	3010026O09Rik	1.04	0.58
ENSMUSG00000051219	3100002H09Rik	0	0.41
ENSMUSG00000028398	3110001D03Rik	71.32	77.34
ENSMUSG00000079737	3110001I22Rik	0.17	0
ENSMUSG00000024410	3110002H16Rik	5.6	7.26
ENSMUSG00000078453	3110003A17Rik	2.8	6.14
ENSMUSG00000079450	3110007F17Rik	0.19	0
ENSMUSG00000026388	3110009E18Rik	0.89	2.82
ENSMUSG00000060375	3110018I06Rik	0	0
ENSMUSG00000050604	3110021A11Rik	0	2.69
ENSMUSG00000067879	3110035E14Rik	0	0
ENSMUSG00000089922	3110039M20Rik	0	0
ENSMUSG00000025102	3110040N11Rik	21.34	7.91
ENSMUSG00000028300	3110043O21Rik	4.89	13.69
ENSMUSG00000090061	3110047P20Rik	0	0
ENSMUSG00000035868	3110052M02Rik	0	0
ENSMUSG00000035206	3110056O03Rik	2.96	4.24
ENSMUSG00000037818	3110057O12Rik	1.11	3.15
ENSMUSG00000046806	3110062M04Rik	1.08	1.75
ENSMUSG00000074635	3110070M22Rik	0.28	0.39
ENSMUSG00000026258	3110079O15Rik	0	0
ENSMUSG00000042256	3110082D06Rik	0	0.01
ENSMUSG00000053553	3110082I17Rik	4.35	2
ENSMUSG00000086815	3110082J24Rik	0	0
ENSMUSG00000030649	3200002M19Rik	26.94	58.91
ENSMUSG00000073590	3222401L13Rik	0.22	0.36
ENSMUSG00000035399	3230401D17Rik	15.1	37.93
ENSMUSG00000063364	3300002I08Rik	0.29	1.4
ENSMUSG00000071540	3425401B19Rik	8.89	0.9
ENSMUSG00000036242	3632451O06Rik	0.7	3.88
ENSMUSG00000031125	3830403N18Rik	0	0
ENSMUSG00000033111	3830406C13Rik	3.28	3.27
ENSMUSG00000071181	3830408C21Rik	0	0.11
ENSMUSG00000031179	3830417A13Rik	0	0
ENSMUSG00000066438	3830431G21Rik	0	0.03
ENSMUSG00000038917	3930402G23Rik	0	0
ENSMUSG00000064202	4430402I18Rik	0.52	0.42
ENSMUSG00000042579	4632404H12Rik	0.37	0.89
ENSMUSG00000010453	4632411B12Rik	5.12	72.05
ENSMUSG00000034105	4632415K11Rik	0.43	1.15
ENSMUSG00000048106	4632415L05Rik	0.07	2.46
ENSMUSG00000020101	4632428N05Rik	1.05	5.12
ENSMUSG00000063757	4632433K11Rik	0.28	5.26
ENSMUSG00000030641	4632434I11Rik	0.02	0
ENSMUSG00000046548	4731417B20Rik	0	0
ENSMUSG00000048478	4732415M23Rik	0	0.66
ENSMUSG00000034210	4732418C07Rik	5.21	10.77
ENSMUSG00000073741	4732440D04Rik	0	0
ENSMUSG00000048699	4732456N10Rik	0	0
ENSMUSG00000071107	4732465J04Rik	0	0
ENSMUSG00000043183	4732471D19Rik	0.67	2.87
ENSMUSG00000053714	4732471J01Rik	0	0
ENSMUSG00000054150	4831426I19Rik	0.07	0.43
ENSMUSG00000046828	4832428D23Rik	0.51	0.69
ENSMUSG00000024481	4833403I15Rik	0	0.03
ENSMUSG00000062822	4833420G17Rik	2.57	60.86
ENSMUSG00000075217	4833423E24Rik	0	0
ENSMUSG00000033342	4833424O15Rik	0	0
ENSMUSG00000032057	4833427G06Rik	0	0
ENSMUSG00000025871	4833439L19Rik	75.05	24.36
ENSMUSG00000039958	4833442J19Rik	6	25.56
ENSMUSG00000023350	4921501E09Rik	0	0
ENSMUSG00000026734	4921504E06Rik	0	0
ENSMUSG00000029828	4921507P07Rik	0.15	0
ENSMUSG00000052376	4921508M14Rik	0	0
ENSMUSG00000061525	4921509C19Rik	0	0
ENSMUSG00000047025	4921510H08Rik	0	0
ENSMUSG00000049815	4921511C20Rik	0	0
ENSMUSG00000040514	4921511H03Rik	0	0
ENSMUSG00000067208	4921511M17Rik	0	0
ENSMUSG00000066944	4921513D11Rik	0.11	0.23
ENSMUSG00000060657	4921513D23Rik	0.38	4.65
ENSMUSG00000044544	4921513I03Rik	0	0
ENSMUSG00000045662	4921515J06Rik	0	0
ENSMUSG00000066368	4921517D21Rik	0	0
ENSMUSG00000049902	4921517D22Rik	0	0
ENSMUSG00000038085	4921517L17Rik	3.03	4
ENSMUSG00000040467	4921522P10Rik	0	0
ENSMUSG00000044957	4921523A10Rik	0.06	0.12
ENSMUSG00000036934	4921524J17Rik	4.15	11.11
ENSMUSG00000039540	4921524L21Rik	0	0
ENSMUSG00000024306	4921528I01Rik	0	0
ENSMUSG00000064299	4921528I07Rik	0	0
ENSMUSG00000071890	4921528O07Rik	0	0
ENSMUSG00000026940	4921530D09Rik	0.09	0.62
ENSMUSG00000034689	4921530L21Rik	0	0
ENSMUSG00000020434	4921536K21Rik	0.05	0
ENSMUSG00000028520	4921539E11Rik	0	0
ENSMUSG00000056919	4922501C03Rik	0.19	2.98
ENSMUSG00000042943	4922501L14Rik	0	0
ENSMUSG00000054165	4922502B01Rik	0	0
ENSMUSG00000057387	4922502B01Rik	0	0
ENSMUSG00000047720	4922502D21Rik	0	0
ENSMUSG00000043429	4922505E12Rik	0	0
ENSMUSG00000074627	4922505G16Rik	0.04	0.1
ENSMUSG00000079421	4930402F06Rik	0	0
ENSMUSG00000027309	4930402H24Rik	0.24	14.44
ENSMUSG00000045797	4930402K13Rik	0	0
ENSMUSG00000021086	4930403N07Rik	0	0
ENSMUSG00000020332	4930404A10Rik	0	0
ENSMUSG00000030976	4930404H21Rik	0	0
ENSMUSG00000079001	4930404H24Rik	0	0
ENSMUSG00000020234	4930404N11Rik	0	0
ENSMUSG00000075524	4930407I10Rik	0	0
ENSMUSG00000079566	4930408F14Rik	0	0
ENSMUSG00000021101	4930408O17Rik	0	0
ENSMUSG00000043569	4930412D23Rik	0	0
ENSMUSG00000043633	4930412F15Rik	0.75	0.77
ENSMUSG00000025783	4930412O13Rik	0	0
ENSMUSG00000020191	4930415F15Rik	0	0
ENSMUSG00000035387	4930415L06Rik	0	0
ENSMUSG00000022993	4930415O20Rik	0.39	0
ENSMUSG00000079177	4930417G10Rik	0	0.22
ENSMUSG00000079659	4930420K17Rik	4.84	2.19
ENSMUSG00000051278	4930422G04Rik	0.02	3.04
ENSMUSG00000062087	4930423O20Rik	0	0
ENSMUSG00000062501	4930425F17Rik	0	0
ENSMUSG00000026736	4930426L09Rik	0	0
ENSMUSG00000037466	4930427A07Rik	0.12	0.46
ENSMUSG00000073085	4930428D18Rik	0	0
ENSMUSG00000073094	4930428E23Rik	0	0
ENSMUSG00000049507	4930429B21Rik	0.04	0
ENSMUSG00000027157	4930430A15Rik	0	0
ENSMUSG00000068046	4930430D24Rik	0	0
ENSMUSG00000046567	4930430F08Rik	1.02	1.77
ENSMUSG00000057354	4930430O22Rik	0	0
ENSMUSG00000062496	4930431F12Rik	0	0
ENSMUSG00000046958	4930432E11Rik	0	0
ENSMUSG00000002240	4930432K09Rik	0	0
ENSMUSG00000008129	4930432K21Rik	0.13	0.09
ENSMUSG00000074248	4930432M17Rik	0	0
ENSMUSG00000091692	4930433I11Rik	0	0
ENSMUSG00000042360	4930433N12Rik	0	0
ENSMUSG00000022798	4930435E12Rik	0	0
ENSMUSG00000029092	4930435H24Rik	0	0
ENSMUSG00000069873	4930438A08Rik	0	0
ENSMUSG00000044081	4930441O14Rik	0.03	0
ENSMUSG00000053603	4930442H23Rik	0	0
ENSMUSG00000027880	4930443G12Rik	0	0
ENSMUSG00000037251	4930444A02Rik	2.09	2.68
ENSMUSG00000069712	4930444G20Rik	0	0
ENSMUSG00000067795	4930444P10Rik	0	0.28
ENSMUSG00000022288	4930447A16Rik	0	0
ENSMUSG00000021098	4930447C04Rik	0	1.49
ENSMUSG00000031182	4930447F04Rik	0	0
ENSMUSG00000074589	4930449A18Rik	0	0
ENSMUSG00000022116	4930449E01Rik	0	0
ENSMUSG00000079093	4930449I24Rik	0	0
ENSMUSG00000022759	4930451C15Rik	0.22	0.09
ENSMUSG00000022543	4930451G09Rik	0.1	0
ENSMUSG00000045989	4930451I11Rik	0	0
ENSMUSG00000021747	4930452B06Rik	0.03	0
ENSMUSG00000059920	4930453N24Rik	50.35	42.67
ENSMUSG00000002846	4930455C21Rik	21.07	5.95
ENSMUSG00000026578	4930455F23Rik	5.64	3.74
ENSMUSG00000080907	4930455H04Rik	0.06	0
ENSMUSG00000056223	4930458L03Rik	0	0
ENSMUSG00000074456	4930467E23Rik	0	0.21
ENSMUSG00000079525	4930468A15Rik	0	0
ENSMUSG00000043583	4930470P17Rik	0	0
ENSMUSG00000029175	4930471M23Rik	2.75	3.17
ENSMUSG00000052407	4930473A06Rik	0.07	4.66
ENSMUSG00000049546	4930474N05Rik	0	0
ENSMUSG00000049761	4930479M11Rik	0	0
ENSMUSG00000035651	4930480E11Rik	0	0
ENSMUSG00000086938	4930481A15Rik	3.28	0.99
ENSMUSG00000050345	4930486L24Rik	0.17	0.15
ENSMUSG00000044306	4930500M09Rik	0	0
ENSMUSG00000055555	4930502E18Rik	0.05	0
ENSMUSG00000090202	4930503B20Rik	0	0
ENSMUSG00000072595	4930503E14Rik	0	0
ENSMUSG00000044906	4930503L19Rik	0.25	0.61
ENSMUSG00000052642	4930504O13Rik	0	0
ENSMUSG00000040919	4930505A04Rik	0	0
ENSMUSG00000041362	4930506M07Rik	0.15	0.95
ENSMUSG00000032048	4930510E17Rik	0	0
ENSMUSG00000024223	4930511I11Rik	0	0
ENSMUSG00000014529	4930511M11Rik	0	0
ENSMUSG00000020992	4930512B01Rik	0	0
ENSMUSG00000062511	4930512M02Rik	0	0
ENSMUSG00000031270	4930513O06Rik	0	0
ENSMUSG00000074629	4930518I15Rik	0	0.62
ENSMUSG00000031325	4930519F16Rik	0	0
ENSMUSG00000029564	4930519G04Rik	0	0
ENSMUSG00000026063	4930521A18Rik	0	0
ENSMUSG00000060491	4930522H14Rik	0	0
ENSMUSG00000072762	4930522L14Rik	0.49	1.49
ENSMUSG00000050883	4930523C07Rik	0	0
ENSMUSG00000090394	4930523C07Rik	0.38	1.46
ENSMUSG00000020299	4930524B15Rik	0	0
ENSMUSG00000047079	4930524E20Rik	0	0
ENSMUSG00000035364	4930524J08Rik	0.16	0.25
ENSMUSG00000059663	4930524N10Rik	0	0
ENSMUSG00000027209	4930525F21Rik	0	0
ENSMUSG00000068173	4930525M21Rik	0	0
ENSMUSG00000045794	4930526D03Rik	0	0
ENSMUSG00000024155	4930528F23Rik	0.04	0
ENSMUSG00000046282	4930529F22Rik	0	0
ENSMUSG00000037143	4930529M08Rik	0	0
ENSMUSG00000047692	4930533K18Rik	0	0
ENSMUSG00000051614	4930533L02Rik	0	0
ENSMUSG00000061533	4930534B04Rik	0.3	1.76
ENSMUSG00000028642	4930538K18Rik	0.1	1.58
ENSMUSG00000048905	4930539E08Rik	0.01	0
ENSMUSG00000090724	4930542C12Rik	0	0
ENSMUSG00000025051	4930542N07Rik	0	0
ENSMUSG00000036463	4930544G11Rik	0	0
ENSMUSG00000073803	4930544L04Rik	0	0
ENSMUSG00000051758	4930544M13Rik	0	0
ENSMUSG00000044556	4930544O15Rik	3.23	1.24
ENSMUSG00000024546	4930546C10Rik	0	0
ENSMUSG00000028314	4930547C10Rik	0	0
ENSMUSG00000035365	4930547N16Rik	0.04	0
ENSMUSG00000051198	4930548G14Rik	0	0
ENSMUSG00000029138	4930548H24Rik	0	0
ENSMUSG00000036921	4930549C01Rik	0	0
ENSMUSG00000005131	4930550C14Rik	0.12	0
ENSMUSG00000046180	4930550L24Rik	0.09	0
ENSMUSG00000054351	4930553M12Rik	0	0
ENSMUSG00000031559	4930555F03Rik	0	0
ENSMUSG00000079381	4930555G01Rik	0	0
ENSMUSG00000028801	4930555I21Rik	0	0
ENSMUSG00000034493	4930556J24Rik	0	0
ENSMUSG00000048994	4930557A04Rik	0	0
ENSMUSG00000086277	4930558K02Rik	0	0
ENSMUSG00000022518	4930562C15Rik	0	0
ENSMUSG00000026729	4930562F07Rik	0	7.51
ENSMUSG00000051728	4930563D23Rik	0	0
ENSMUSG00000086112	4930563I02Rik	0	0
ENSMUSG00000022002	4930564B18Rik	0	0
ENSMUSG00000051788	4930564D02Rik	0	0
ENSMUSG00000054773	4930566N20Rik	0	0
ENSMUSG00000073141	4930567H17Rik	0	0
ENSMUSG00000026882	4930568D16Rik	0	0
ENSMUSG00000041512	4930569F06Rik	0	0
ENSMUSG00000090861	4930570N19Rik	0.18	0
ENSMUSG00000090457	4930571K23Rik	0	0
ENSMUSG00000056665	4930572J05Rik	9.6	0
ENSMUSG00000069720	4930572O03Rik	0	0
ENSMUSG00000037358	4930578C19Rik	0.12	1.07
ENSMUSG00000054885	4930578G10Rik	0	0
ENSMUSG00000021961	4930578I06Rik	0	0
ENSMUSG00000044480	4930578I07Rik	0	0
ENSMUSG00000070883	4930578N16Rik	0.08	2.94
ENSMUSG00000074146	4930579C12Rik	0	0
ENSMUSG00000028575	4930579C15Rik	0.27	1.32
ENSMUSG00000012042	4930579F01Rik	0	0.17
ENSMUSG00000025535	4930579G22Rik	0	0.23
ENSMUSG00000027811	4930579G24Rik	0.44	0
ENSMUSG00000051074	4930579K19Rik	0	0
ENSMUSG00000037161	4930583H14Rik	0.09	0.09
ENSMUSG00000024088	4930583I09Rik	0	0
ENSMUSG00000029044	4930584F24Rik	0	0
ENSMUSG00000029660	4930588N13Rik	0	0
ENSMUSG00000068957	4930589L23Rik	0	0
ENSMUSG00000034063	4930590J08Rik	0.02	0
ENSMUSG00000039138	4930591A17Rik	0	0
ENSMUSG00000083193	4930595D18Rik	0	0
ENSMUSG00000060673	4930595M18Rik	0	0
ENSMUSG00000041068	4930596D02Rik	0	0
ENSMUSG00000053442	4930597O21Rik	0	1.16
ENSMUSG00000031194	4931400O07Rik	0	0
ENSMUSG00000013353	4931406B18Rik	0	0
ENSMUSG00000031938	4931406C07Rik	2.01	6.9
ENSMUSG00000066571	4931406P16Rik	0.72	6.49
ENSMUSG00000007907	4931407G18Rik	0	0
ENSMUSG00000039903	4931408A02Rik	0.33	0.64
ENSMUSG00000073722	4931408C20Rik	0	0
ENSMUSG00000038199	4931409K22Rik	0	0
ENSMUSG00000022179	4931414P19Rik	0.38	0.25
ENSMUSG00000056197	4931417E11Rik	0	0
ENSMUSG00000033963	4931417G12Rik	0	0
ENSMUSG00000046085	4931422A03Rik	0	0
ENSMUSG00000026774	4931423N10Rik	0	0
ENSMUSG00000014837	4931428F04Rik	0.4	0.8
ENSMUSG00000086727	4931428L18Rik	0	0
ENSMUSG00000032023	4931429I11Rik	0	0
ENSMUSG00000056617	4931429L15Rik	0	0
ENSMUSG00000047324	4931429P17Rik	0	0
ENSMUSG00000055643	4931431F19Rik	0	0
ENSMUSG00000078157	4931440F15Rik	0.02	0.08
ENSMUSG00000046367	4931440L10Rik	0	0
ENSMUSG00000074580	4931440P22Rik	0.08	0.45
ENSMUSG00000047490	4932411E22Rik	0	0
ENSMUSG00000043986	4932411G14Rik	0	0
ENSMUSG00000058670	4932411N23Rik	0	0
ENSMUSG00000040367	4932412H11Rik	0	0
ENSMUSG00000079324	4932414N04Rik	0	0
ENSMUSG00000044581	4932415D10Rik	0	0
ENSMUSG00000048038	4932418E24Rik	0	0
ENSMUSG00000022805	4932425I24Rik	0	0
ENSMUSG00000079513	4932429P05Rik	0	0
ENSMUSG00000074224	4932431P20Rik	0	0
ENSMUSG00000037270	4932438A13Rik	2.38	116.74
ENSMUSG00000039851	4932438H23Rik	0.06	0.27
ENSMUSG00000074849	4932441B19Rik	0	0
ENSMUSG00000050709	4932442E05Rik	0	1.69
ENSMUSG00000043549	4932442L08Rik	0	0
ENSMUSG00000090336	4932443I19Rik	0	0
ENSMUSG00000055357	4933400A11Rik	0	0
ENSMUSG00000044787	4933400C05Rik	0	0.1
ENSMUSG00000025961	4933402D24Rik	0	0
ENSMUSG00000045330	4933402E13Rik	0	0
ENSMUSG00000069971	4933402J07Rik	0	0
ENSMUSG00000013668	4933402N03Rik	0	0
ENSMUSG00000091422	4933402N22Rik	0	0
ENSMUSG00000044084	4933402P03Rik	0	0
ENSMUSG00000038121	4933403F05Rik	4.85	11.45
ENSMUSG00000050930	4933403G14Rik	0.47	0.13
ENSMUSG00000079460	4933403O08Rik	0	0
ENSMUSG00000075302	4933404M02Rik	0	0
ENSMUSG00000013158	4933405L10Rik	0.07	0
ENSMUSG00000027229	4933406J08Rik	0	0
ENSMUSG00000050526	4933406M09Rik	0	0
ENSMUSG00000069713	4933406P04Rik	0	0
ENSMUSG00000034390	4933407C03Rik	0.66	5.71
ENSMUSG00000037355	4933407H18Rik	0.07	2.73
ENSMUSG00000026224	4933407L21Rik	0.07	0
ENSMUSG00000049506	4933407P14Rik	0	0
ENSMUSG00000049357	4933408B17Rik	0	0.24
ENSMUSG00000053896	4933409G03Rik	0	0
ENSMUSG00000073874	4933409K07Rik	0	0
ENSMUSG00000062224	4933411G06Rik	0	0
ENSMUSG00000029586	4933411G11Rik	0	0
ENSMUSG00000090369	4933411K16Rik	0	0
ENSMUSG00000031631	4933411K20Rik	1.68	2.73
ENSMUSG00000071749	4933412E24Rik	0	0
ENSMUSG00000079304	4933413G19Rik	0	0
ENSMUSG00000072983	4933414I15Rik	0	0
ENSMUSG00000045877	4933415A04Rik	0	0
ENSMUSG00000073730	4933415F23Rik	0.41	0.16
ENSMUSG00000074734	4933416C03Rik	0	0
ENSMUSG00000021415	4933417A18Rik	0	0
ENSMUSG00000056260	4933421E11Rik	1.72	6.55
ENSMUSG00000030463	4933421I07Rik	0	0
ENSMUSG00000070332	4933422H20Rik	0	0
ENSMUSG00000040250	4933424B01Rik	6.08	49.43
ENSMUSG00000021718	4933425L06Rik	0	0
ENSMUSG00000049692	4933425O20Rik	0	0
ENSMUSG00000021133	4933426M11Rik	5.23	12.82
ENSMUSG00000055403	4933427D06Rik	0	0
ENSMUSG00000020807	4933427D14Rik	0.17	20.24
ENSMUSG00000044276	4933427E11Rik	0	0
ENSMUSG00000030877	4933427G17Rik	0	0
ENSMUSG00000073761	4933427I04Rik	0	0
ENSMUSG00000047988	4933428G20Rik	0	1.43
ENSMUSG00000042525	4933428M09Rik	0	0
ENSMUSG00000023084	4933430H15Rik	0	1.67
ENSMUSG00000058046	4933430I17Rik	0.08	0
ENSMUSG00000042564	4933432B09Rik	0	0.32
ENSMUSG00000036770	4933433C11Rik	0	0
ENSMUSG00000044715	4933433P14Rik	1.87	4.03
ENSMUSG00000027942	4933434E20Rik	72.21	72.77
ENSMUSG00000035057	4933434I20Rik	0	0
ENSMUSG00000031736	4933436C20Rik	0.68	0.17
ENSMUSG00000025288	4933436I01Rik	0	0
ENSMUSG00000072919	4933437F05Rik	0.29	1.29
ENSMUSG00000018415	4933439F18Rik	16.62	14.12
ENSMUSG00000045928	4933440M02Rik	0	0
ENSMUSG00000042087	4933440N22Rik	0	0
ENSMUSG00000051940	5031410I06Rik	0	0
ENSMUSG00000034959	5031414D18Rik	0	0.17
ENSMUSG00000073147	5031425E22Rik	4.11	17.18
ENSMUSG00000044574	5031434C07Rik	0	1.1
ENSMUSG00000036046	5031439G07Rik	18.83	17.69
ENSMUSG00000055137	5033411D12Rik	0	0.87
ENSMUSG00000016495	5033414D02Rik	15.94	46
ENSMUSG00000038152	5033430I15Rik	3.62	7.49
ENSMUSG00000050002	5133401N09Rik	2.95	5.49
ENSMUSG00000040412	5330417C22Rik	0	0
ENSMUSG00000049740	5330417H12Rik	0	1.17
ENSMUSG00000022639	5330426P16Rik	1.13	6.74
ENSMUSG00000046610	5330437I02Rik	0	0.03
ENSMUSG00000091393	5330438I03Rik	0	0
ENSMUSG00000041614	5330439B14Rik	0	0
ENSMUSG00000059364	5430401F13Rik	0	0
ENSMUSG00000044121	5430402E10Rik	0	0
ENSMUSG00000072763	5430403G16Rik	0.04	0.24
ENSMUSG00000044364	5430405G05Rik	1.1	0.07
ENSMUSG00000045319	5430407P10Rik	0.47	0.15
ENSMUSG00000039840	5430411K18Rik	1.03	20.75
ENSMUSG00000006204	5430419D17Rik	0	0
ENSMUSG00000067613	5430421N21Rik	0	0
ENSMUSG00000025058	5430427O19Rik	0	0
ENSMUSG00000052688	5430435G22Rik	0.21	3.54
ENSMUSG00000031820	5430437P03Rik	36.21	23.15
ENSMUSG00000055594	5530400C23Rik	0	0
ENSMUSG00000020703	5530401A14Rik	0	0
ENSMUSG00000004071	5730403B10Rik	27.42	30.56
ENSMUSG00000073755	5730409E04Rik	10.52	32.99
ENSMUSG00000030279	5730419I09Rik	1.94	59.63
ENSMUSG00000004945	5730437N04Rik	94.93	38.16
ENSMUSG00000054237	5730455O13Rik	12.49	47.99
ENSMUSG00000057181	5730455P16Rik	3.51	7.83
ENSMUSG00000062046	5730460C07Rik	0	0
ENSMUSG00000021792	5730469M10Rik	17.48	11.4
ENSMUSG00000024269	5730494M16Rik	1.73	2.72
ENSMUSG00000027341	5730494N06Rik	13.52	23.95
ENSMUSG00000073197	5730507C01Rik	0	0
ENSMUSG00000050549	5730508B09Rik	1.97	2.54
ENSMUSG00000032985	5730522E02Rik	0	0
ENSMUSG00000073101	5730522E02Rik	0	0
ENSMUSG00000039693	5730528L13Rik	8.93	3.89
ENSMUSG00000041605	5730559C18Rik	0	0
ENSMUSG00000046591	5730590G19Rik	0.01	0
ENSMUSG00000056468	5730596B20Rik	0	0
ENSMUSG00000045968	5830403L16Rik	0.19	0
ENSMUSG00000054672	5830411N06Rik	0	0
ENSMUSG00000028331	5830415F09Rik	0.97	0.26
ENSMUSG00000046111	5830418K08Rik	1.04	8.26
ENSMUSG00000028578	5830433M19Rik	0.37	0.41
ENSMUSG00000052658	5830454E08Rik	3.7	1.26
ENSMUSG00000091102	5830462I19Rik	0	0
ENSMUSG00000073623	5830472F04Rik	0	0
ENSMUSG00000070690	5830473C10Rik	0	0
ENSMUSG00000046463	5930403N24Rik	0	0
ENSMUSG00000048668	5930416I19Rik	3.52	7.21
ENSMUSG00000048544	5930422O12Rik	0	0
ENSMUSG00000015488	5930434B04Rik	21.82	18.13
ENSMUSG00000056306	6030405A18Rik	0	0
ENSMUSG00000075408	6030408B16Rik	0.07	0
ENSMUSG00000066607	6030419C18Rik	5.34	0.27
ENSMUSG00000091354	6030419C18Rik	0.58	0
ENSMUSG00000046101	6030422M02Rik	0	0
ENSMUSG00000055809	6030429G01Rik	0.03	0
ENSMUSG00000066178	6030445D17Rik	0	0.28
ENSMUSG00000049411	6030446N20Rik	0.22	1.38
ENSMUSG00000054069	6030452D12Rik	0	0
ENSMUSG00000022195	6030458C11Rik	4.27	17.53
ENSMUSG00000025573	6030468B19Rik	0	0
ENSMUSG00000073142	6030469F06Rik	0	0
ENSMUSG00000051361	6030498E09Rik	0	0
ENSMUSG00000028246	6230409E13Rik	0	0
ENSMUSG00000042106	6230427J02Rik	2.68	3.74
ENSMUSG00000053963	6330403A02Rik	0.16	0.04
ENSMUSG00000075585	6330403L08Rik	1.73	2
ENSMUSG00000029659	6330406I15Rik	1.09	6.7
ENSMUSG00000038916	6330407J23Rik	0.02	0
ENSMUSG00000070814	6330408A02Rik	3.29	8.46
ENSMUSG00000009551	6330409D20Rik	0	0
ENSMUSG00000021930	6330409N04Rik	13.98	15.79
ENSMUSG00000045917	6330416G13Rik	3.05	9.39
ENSMUSG00000037259	6330439K17Rik	0.02	0.01
ENSMUSG00000051976	6330444E15Rik	0	0
ENSMUSG00000033904	6330503K22Rik	0.52	9
ENSMUSG00000045777	6330512M04Rik	1.57	0
ENSMUSG00000027270	6330527O06Rik	0	0
ENSMUSG00000073733	6330545A04Rik	0	0.35
ENSMUSG00000026112	6330578E17Rik	34.8	56.52
ENSMUSG00000034168	6430527G18Rik	2.94	5.39
ENSMUSG00000073795	6430531B16Rik	0.05	0
ENSMUSG00000031824	6430548M08Rik	0.99	0.58
ENSMUSG00000074646	6430550D23Rik	0	0.49
ENSMUSG00000037977	6430571L13Rik	18	46.77
ENSMUSG00000039620	6430573F11Rik	0	0
ENSMUSG00000045348	6430598A04Rik	0.02	0
ENSMUSG00000045589	6430704M03Rik	0	0
ENSMUSG00000020956	6530401N04Rik	5.64	6.71
ENSMUSG00000052979	6530403G13Rik	1.34	0
ENSMUSG00000043340	6530409C15Rik	0	0.68
ENSMUSG00000048458	6530418L21Rik	1.04	1.59
ENSMUSG00000033940	6720456B07Rik	51.17	48.14
ENSMUSG00000036339	6720456H20Rik	0.39	1.24
ENSMUSG00000022070	6720463M24Rik	0.34	2.34
ENSMUSG00000072066	6720489N17Rik	0	0
ENSMUSG00000032680	6820408C15Rik	0.05	0
ENSMUSG00000074123	7420426K07Rik	0	0
ENSMUSG00000091060	7420461P10Rik	0	0
ENSMUSG00000027444	8030411F24Rik	0	0
ENSMUSG00000052295	8030423F21Rik	0	0
ENSMUSG00000021600	8030423J24Rik	0	0
ENSMUSG00000047466	8030462N17Rik	0.52	0
ENSMUSG00000046774	8030474K03Rik	0.04	0
ENSMUSG00000027424	8430406I07Rik	4.03	2.96
ENSMUSG00000048489	8430408G22Rik	1.67	11.97
ENSMUSG00000030060	8430410A17Rik	2.47	5.19
ENSMUSG00000041124	8430410K20Rik	10.56	23.08
ENSMUSG00000030207	8430419L09Rik	0.88	5.52
ENSMUSG00000079069	8430423G03Rik	0	0
ENSMUSG00000061411	8430427H17Rik	0.08	0.82
ENSMUSG00000041878	8430432A02Rik	0	0
ENSMUSG00000079709	9030025P20Rik	1.54	2.35
ENSMUSG00000045555	9030224M15Rik	0.15	1.58
ENSMUSG00000070476	9030418K01Rik	0.4	1.98
ENSMUSG00000032024	9030425E11Rik	0.39	1.77
ENSMUSG00000045008	9030612E09Rik	1.05	1.46
ENSMUSG00000021185	9030617O03Rik	4.79	8.57
ENSMUSG00000053168	9030619P08Rik	0	0.28
ENSMUSG00000073158	9030624G23Rik	0	0.41
ENSMUSG00000030982	9030624J02Rik	5.57	16.19
ENSMUSG00000044350	9030625A04Rik	0.06	0.19
ENSMUSG00000054951	9130008F23Rik	0	1.14
ENSMUSG00000039901	9130011E15Rik	0.81	1.39
ENSMUSG00000044600	9130011J15Rik	14.41	14.27
ENSMUSG00000050994	9130014G24Rik	0	0.5
ENSMUSG00000035852	9130017N09Rik	0	0
ENSMUSG00000030823	9130019O22Rik	0.27	0.54
ENSMUSG00000062944	9130023H24Rik	0.49	0.18
ENSMUSG00000091175	9130204L05Rik	0	0
ENSMUSG00000054579	9130219A07Rik	0	0
ENSMUSG00000090330	9130221H12Rik	2.03	3.6
ENSMUSG00000054598	9130230L23Rik	0	0
ENSMUSG00000022362	9130401M01Rik	17.22	15.25
ENSMUSG00000024105	9130404H23Rik	0	0
ENSMUSG00000038768	9130409I23Rik	0	0.05
ENSMUSG00000072982	9230009I02Rik	0	0
ENSMUSG00000071434	9230019H11Rik	0	0
ENSMUSG00000079602	9230102O04Rik	0	0
ENSMUSG00000027446	9230104L09Rik	0	0
ENSMUSG00000042940	9230106D20Rik	0	0
ENSMUSG00000078800	9230107M04Rik	0	0
ENSMUSG00000051237	9230109A22Rik	0	0
ENSMUSG00000053070	9230110C19Rik	0.05	0
ENSMUSG00000047980	9230110F15Rik	0	0
ENSMUSG00000021797	9230112D13Rik	0	0
ENSMUSG00000070461	9230112E08Rik	0.61	0.15
ENSMUSG00000078934	9230113P08Rik	0	0
ENSMUSG00000049571	9330101J02Rik	0	0.67
ENSMUSG00000056031	9330154J02Rik	0	0
ENSMUSG00000004360	9330159F19Rik	1.93	5.67
ENSMUSG00000072809	9330160F10Rik	0.19	1.03
ENSMUSG00000055271	9330161L09Rik	0	0
ENSMUSG00000039133	9330171B17Rik	0	0
ENSMUSG00000056004	9330182L06Rik	0	0
ENSMUSG00000087212	9330188P03Rik	0.17	0
ENSMUSG00000062704	9430002A10Rik	2.2	5.74
ENSMUSG00000028593	9430007A20Rik	0	0
ENSMUSG00000059939	9430015G10Rik	0.52	2.49
ENSMUSG00000025971	9430016H08Rik	4.88	5.62
ENSMUSG00000033960	9430020K01Rik	1.32	4.44
ENSMUSG00000037204	9430023L20Rik	35.39	104.17
ENSMUSG00000054976	9430031J16Rik	0	0
ENSMUSG00000040139	9430038I01Rik	3.91	12.44
ENSMUSG00000026601	9430070O13Rik	0	0
ENSMUSG00000090982	9430076C15Rik	0	0
ENSMUSG00000075405	9430097D07Rik	0	0
ENSMUSG00000023263	9530002B09Rik	0	0
ENSMUSG00000020177	9530003J23Rik	0	0
ENSMUSG00000058022	9530008L14Rik	0	0
ENSMUSG00000078776	9530053A07Rik	0	0
ENSMUSG00000036275	9530068E07Rik	25.82	26.54
ENSMUSG00000036411	9530077C05Rik	0.04	0.05
ENSMUSG00000091403	9530085L02Rik	0	0
ENSMUSG00000073576	9630014M24Rik	0	0.18
ENSMUSG00000038028	9630033F20Rik	23.17	36.08
ENSMUSG00000057710	9630041A04Rik	0	0
ENSMUSG00000055485	9830001H06Rik	0.08	2.29
ENSMUSG00000073386	9830107B12Rik	0	0
ENSMUSG00000074158	9830147E19Rik	0.12	0.49
ENSMUSG00000044551	9930012K11Rik	0.04	0.5
ENSMUSG00000052353	9930013L23Rik	0	0.02
ENSMUSG00000045744	9930021D14Rik	0	0
ENSMUSG00000046138	9930021J03Rik	1.34	12.62
ENSMUSG00000045065	9930022D16Rik	0	0.07
ENSMUSG00000035818	9930023K05Rik	0.03	0.31
ENSMUSG00000069893	9930111J21Rik1	0.06	0.3
ENSMUSG00000069892	9930111J21Rik2	0	2.22
ENSMUSG00000027596	a	0	0
ENSMUSG00000079144	A130010J15Rik	0.61	0.77
ENSMUSG00000035245	A130022J15Rik	1.3	13.3
ENSMUSG00000051480	A130050O07Rik	0	0
ENSMUSG00000022347	A1bg	0	0
ENSMUSG00000052595	A1cf	0	0
ENSMUSG00000078690	A230006K03Rik	0	0
ENSMUSG00000034560	A230046K03Rik	0.44	35.97
ENSMUSG00000038884	A230050P20Rik	0.05	1.95
ENSMUSG00000049287	A230051G13Rik	2.5	3.53
ENSMUSG00000020887	A230052G05Rik	0	0
ENSMUSG00000087075	A230065H16Rik	0	0
ENSMUSG00000092071	A230065N10Rik	1.14	0.3
ENSMUSG00000074473	A230072I06Rik	0	0
ENSMUSG00000055818	A230083G16Rik	0	0
ENSMUSG00000041625	A2ld1	8.89	7.85
ENSMUSG00000030111	A2m	0.01	0
ENSMUSG00000052479	A330008L17Rik	0	0
ENSMUSG00000073388	A330017A19Rik	0	1.71
ENSMUSG00000040473	A330021E22Rik	0	1.81
ENSMUSG00000087466	A330041J22Rik	2.16	0
ENSMUSG00000043924	A330049M08Rik	0.82	2.83
ENSMUSG00000091636	A330050F15Rik	0.03	0
ENSMUSG00000052014	A330070K13Rik	0	0
ENSMUSG00000028794	A3galt2	0	0
ENSMUSG00000047613	A430005L14Rik	21.48	19.99
ENSMUSG00000056014	A430033K04Rik	0.37	2.16
ENSMUSG00000074497	A430078G23Rik	0	0.21
ENSMUSG00000057135	A430084P05Rik	0	0
ENSMUSG00000067577	A430093F15Rik	0.07	0
ENSMUSG00000045838	A430105I19Rik	2.42	15.3
ENSMUSG00000062980	A430107O13Rik	1.02	22.55
ENSMUSG00000054135	A430110L20Rik	0.09	0.12
ENSMUSG00000035279	A430110N23Rik	1.88	4.27
ENSMUSG00000047878	A4galt	0.51	2.18
ENSMUSG00000037953	A4gnt	0	0
ENSMUSG00000043122	A530016L24Rik	0.18	0.21
ENSMUSG00000053528	A530021J07Rik	0	0
ENSMUSG00000089844	A530032D15Rik	0	0
ENSMUSG00000046764	A530053G22Rik	0	0
ENSMUSG00000021510	A530054K11Rik	0.15	1.07
ENSMUSG00000043939	A530064D06Rik	0	0
ENSMUSG00000090863	A530084C06Rik	0	0
ENSMUSG00000053467	A530088E08Rik	0.04	0
ENSMUSG00000051805	A530095I07Rik	0.2	0
ENSMUSG00000047343	A530098C11Rik	43.75	28.03
ENSMUSG00000047462	A530099J19Rik	0	0
ENSMUSG00000052760	A630001G21Rik	0.19	0.62
ENSMUSG00000035173	A630007B06Rik	1.29	7.49
ENSMUSG00000075395	A630010A05Rik	0	0
ENSMUSG00000054293	A630033H20Rik	0.05	0.24
ENSMUSG00000037991	A630055G03Rik	0.6	0.26
ENSMUSG00000067541	A630073D07Rik	0	0
ENSMUSG00000055446	A630091E08Rik	0	0
ENSMUSG00000070313	A630095E13Rik	0	0
ENSMUSG00000039850	A730011L01Rik	0.79	2.34
ENSMUSG00000047384	A730013G03Rik	0	0
ENSMUSG00000090551	A730015C16Rik	0.16	0
ENSMUSG00000050875	A730017C20Rik	0	0
ENSMUSG00000047828	A730018C14Rik	0	0
ENSMUSG00000044522	A730020M07Rik	0	0
ENSMUSG00000048655	A730037C10Rik	0	0
ENSMUSG00000053979	A730045E13Rik	0	0
ENSMUSG00000048636	A730049H05Rik	0	1.17
ENSMUSG00000053588	A730061H03Rik	0.25	0
ENSMUSG00000053181	A830005F24Rik	0.22	0
ENSMUSG00000059555	A830007P12Rik	0.17	0.08
ENSMUSG00000044060	A830010M20Rik	0.72	5.28
ENSMUSG00000057715	A830018L16Rik	0	0
ENSMUSG00000055010	A830031A19Rik	0	0
ENSMUSG00000091890	A830073O21Rik	0	0
ENSMUSG00000044150	A830080D01Rik	0.25	3.13
ENSMUSG00000074664	A830092H15Rik	0	0
ENSMUSG00000050545	A830093I24Rik	0.07	1.17
ENSMUSG00000048249	A930001N09Rik	1.1	10.59
ENSMUSG00000045506	A930002H24Rik	0	0
ENSMUSG00000050179	A930002I21Rik	0	0
ENSMUSG00000075330	A930003A15Rik	1.43	0
ENSMUSG00000054057	A930004D18Rik	0.39	0.34
ENSMUSG00000054426	A930005H10Rik	14.75	2.88
ENSMUSG00000051246	A930005I04Rik	0.07	0.85
ENSMUSG00000092210	A930009A15Rik	0	0
ENSMUSG00000089809	A930011G23Rik	0	0
ENSMUSG00000040705	A930016O22Rik	5.38	15.66
ENSMUSG00000025727	A930017K11Rik	0	0
ENSMUSG00000090446	A930017M01Rik	0	0
ENSMUSG00000091089	A930018M24Rik	0.84	1.08
ENSMUSG00000032671	A930018P22Rik	0.52	0
ENSMUSG00000090622	A930033H14Rik	0.14	0.77
ENSMUSG00000049001	A930038C07Rik	0.04	0.02
ENSMUSG00000078493	A930039A15Rik	0	0
ENSMUSG00000074357	AA386476	0	1.25
ENSMUSG00000087385	AA415398	1.44	1.36
ENSMUSG00000033213	AA467197	0.2	0
ENSMUSG00000073867	AA474408	0.08	0.13
ENSMUSG00000073497	AA792892	0	0
ENSMUSG00000031792	AA960436	1.41	2.18
ENSMUSG00000042510	AA986860	0.12	0
ENSMUSG00000058093	AA987161	0.29	0.15
ENSMUSG00000036678	Aaas	1.55	5.83
ENSMUSG00000029482	Aacs	0.44	6.38
ENSMUSG00000027761	Aadac	0	0
ENSMUSG00000091376	Aadacl2	0	0
ENSMUSG00000078507	Aadacl3	0	0
ENSMUSG00000057228	Aadat	0	0
ENSMUSG00000037257	Aagab	5.51	7.75
ENSMUSG00000057230	Aak1	0.15	1.63
ENSMUSG00000006299	Aamp	55.84	140.06
ENSMUSG00000020804	Aanat	0	0
ENSMUSG00000068522	Aard	0.06	0
ENSMUSG00000031960	Aars	10.36	28.25
ENSMUSG00000023938	Aars2	3.65	22.19
ENSMUSG00000075528	Aarsd1	151.32	314.51
ENSMUSG00000055923	Aasdh	3.09	53.69
ENSMUSG00000025894	Aasdhppt	3.36	9.07
ENSMUSG00000029695	Aass	0	0.43
ENSMUSG00000018697	Aatf	4.85	15.34
ENSMUSG00000025375	Aatk	0.85	8.72
ENSMUSG00000044471	AB041803	0	4.07
ENSMUSG00000046109	AB041806	0	0
ENSMUSG00000057191	AB124611	0.06	1.35
ENSMUSG00000057880	Abat	0.23	0.47
ENSMUSG00000015243	Abca1	0.22	38.85
ENSMUSG00000050296	Abca12	0	0
ENSMUSG00000004668	Abca13	0	0
ENSMUSG00000062017	Abca14	0	0
ENSMUSG00000054746	Abca15	0	0
ENSMUSG00000051900	Abca16	0	0
ENSMUSG00000035435	Abca17	0	0
ENSMUSG00000026944	Abca2	1.1	3.72
ENSMUSG00000024130	Abca3	1.32	26.12
ENSMUSG00000028125	Abca4	0.06	0.25
ENSMUSG00000018800	Abca5	0.45	3.14
ENSMUSG00000044749	Abca6	0.08	1.38
ENSMUSG00000035722	Abca7	1.26	13.04
ENSMUSG00000041828	Abca8a	3.18	93.76
ENSMUSG00000020620	Abca8b	1.25	34.64
ENSMUSG00000041797	Abca9	0.14	3.85
ENSMUSG00000031974	Abcb10	4.2	5.79
ENSMUSG00000027048	Abcb11	0	0
ENSMUSG00000040584	Abcb1a	1.26	4.67
ENSMUSG00000028970	Abcb1b	0.54	4.46
ENSMUSG00000042476	Abcb4	31.41	27.94
ENSMUSG00000072791	Abcb5	0	0
ENSMUSG00000026198	Abcb6	28.19	112.43
ENSMUSG00000031333	Abcb7	5.38	12.26
ENSMUSG00000028973	Abcb8	17.09	38.91
ENSMUSG00000029408	Abcb9	2.21	5
ENSMUSG00000023088	Abcc1	2.34	51.3
ENSMUSG00000032842	Abcc10	0.33	3.91
ENSMUSG00000036872	Abcc12	0	3.65
ENSMUSG00000025194	Abcc2	0	0
ENSMUSG00000020865	Abcc3	0.18	0
ENSMUSG00000032849	Abcc4	1.7	8.59
ENSMUSG00000022822	Abcc5	5.01	124.86
ENSMUSG00000030834	Abcc6	0	0.37
ENSMUSG00000040136	Abcc8	0.32	0.88
ENSMUSG00000030249	Abcc9	8.32	23.34
ENSMUSG00000031378	Abcd1	4.28	11.69
ENSMUSG00000055782	Abcd2	3.97	5.31
ENSMUSG00000028127	Abcd3	12.32	120.6
ENSMUSG00000021240	Abcd4	1.77	8.22
ENSMUSG00000058355	Abce1	8.51	15.05
ENSMUSG00000038762	Abcf1	24.63	115.78
ENSMUSG00000028953	Abcf2	36.09	35.61
ENSMUSG00000003234	Abcf3	22.26	79.07
ENSMUSG00000024030	Abcg1	0.09	2.08
ENSMUSG00000029802	Abcg2	6.39	31.94
ENSMUSG00000029299	Abcg3	0	0.06
ENSMUSG00000032131	Abcg4	0.05	0
ENSMUSG00000040505	Abcg5	0	0
ENSMUSG00000024254	Abcg8	0	0
ENSMUSG00000033157	Abhd10	6.23	10.69
ENSMUSG00000040532	Abhd11	43.36	45.6
ENSMUSG00000032046	Abhd12	14.54	15.12
ENSMUSG00000090121	Abhd12b	0	0
ENSMUSG00000040396	Abhd13	1.04	1.17
ENSMUSG00000042210	Abhd14a	11.91	10.67
ENSMUSG00000042073	Abhd14b	1.91	7.66
ENSMUSG00000000686	Abhd15	0	0
ENSMUSG00000007036	Abhd16a	36.89	66.29
ENSMUSG00000055882	Abhd16b	0	0
ENSMUSG00000039202	Abhd2	0.14	1.53
ENSMUSG00000002475	Abhd3	0.33	1.01
ENSMUSG00000040997	Abhd4	5.42	3.43
ENSMUSG00000032540	Abhd5	9.65	5.08
ENSMUSG00000025277	Abhd6	1.59	3.83
ENSMUSG00000007950	Abhd8	11.17	5.26
ENSMUSG00000058835	Abi1	2.08	9.56
ENSMUSG00000026782	Abi2	0.68	2.94
ENSMUSG00000018381	Abi3	1.92	7.34
ENSMUSG00000035258	Abi3bp	0.79	64.17
ENSMUSG00000026842	Abl1	1.79	5.96
ENSMUSG00000026596	Abl2	1.13	23.91
ENSMUSG00000025085	Ablim1	2.72	22.84
ENSMUSG00000029095	Ablim2	7.8	47.42
ENSMUSG00000032735	Ablim3	1.36	11.17
ENSMUSG00000015787	Abo	0	0
ENSMUSG00000029811	Abp1	0	0
ENSMUSG00000066583	Abpa	0	0
ENSMUSG00000066584	Abpb	0	0
ENSMUSG00000061795	Abpd	0	0
ENSMUSG00000036521	Abpe	0	0
ENSMUSG00000066586	Abpg	0	0
ENSMUSG00000062556	Abph	0	0
ENSMUSG00000046438	Abpz	0	0
ENSMUSG00000017631	Abr	1.4	7.58
ENSMUSG00000042895	Abra	25.95	35.65
ENSMUSG00000036376	Abt1	11.19	24.03
ENSMUSG00000030083	Abtb1	14.24	85.58
ENSMUSG00000032724	Abtb2	1.8	3.27
ENSMUSG00000093750	AC139849.1	0.02	0
ENSMUSG00000090469	AC166053.1	0	0
ENSMUSG00000079728	AC175035.1	7.7	1.55
ENSMUSG00000079729	AC175035.2	0	0
ENSMUSG00000093536	AC188461.4	0.04	0
ENSMUSG00000079405	AC195488.1	0	0
ENSMUSG00000036138	Acaa1a	38.15	183.13
ENSMUSG00000010651	Acaa1b	0.09	0
ENSMUSG00000036880	Acaa2	109.16	119.3
ENSMUSG00000020532	Acaca	0.5	5.59
ENSMUSG00000042010	Acacb	13.87	70.75
ENSMUSG00000029456	Acad10	0.96	49.06
ENSMUSG00000090150	Acad11	8.66	2.15
ENSMUSG00000042647	Acad12	6.63	11.77
ENSMUSG00000031969	Acad8	13.82	13.23
ENSMUSG00000027710	Acad9	16.25	39.37
ENSMUSG00000026003	Acadl	109.07	101.44
ENSMUSG00000062908	Acadm	122.36	195.97
ENSMUSG00000029545	Acads	38.09	28.96
ENSMUSG00000030861	Acadsb	22.19	33.37
ENSMUSG00000018574	Acadvl	270.92	402.1
ENSMUSG00000030607	Acan	0	0
ENSMUSG00000001588	Acap1	0.03	1.91
ENSMUSG00000049076	Acap2	0.59	15.66
ENSMUSG00000029033	Acap3	0.84	6.38
ENSMUSG00000032047	Acat1	71.23	48.46
ENSMUSG00000023832	Acat2	0.96	0.51
ENSMUSG00000062480	Acat3	0.05	0
ENSMUSG00000026499	Acbd3	1.14	3.36
ENSMUSG00000056938	Acbd4	8.96	22.41
ENSMUSG00000026781	Acbd5	2.42	9.14
ENSMUSG00000033701	Acbd6	50.77	42.27
ENSMUSG00000026644	Acbd7	0	2.51
ENSMUSG00000020704	Accn1	0.05	0
ENSMUSG00000023017	Accn2	0.15	0
ENSMUSG00000038276	Accn3	0.11	9.94
ENSMUSG00000033007	Accn4	0.03	0
ENSMUSG00000028008	Accn5	0	0
ENSMUSG00000040272	Accs	0.42	6.11
ENSMUSG00000075023	Accsl	0	2.53
ENSMUSG00000038000	Acd	3.44	6.07
ENSMUSG00000020681	Ace	2.16	6.16
ENSMUSG00000015405	Ace2	0.02	0
ENSMUSG00000045019	Acer1	0.03	0
ENSMUSG00000038007	Acer2	0.33	0.26
ENSMUSG00000091609	Acer2	0	0
ENSMUSG00000030760	Acer3	0.96	2.26
ENSMUSG00000023328	Ache	8.22	3.78
ENSMUSG00000022185	Acin1	8.33	156.8
ENSMUSG00000020917	Acly	1.28	14.18
ENSMUSG00000026348	Acmsd	0	0
ENSMUSG00000042505	Acn9	2.31	2.88
ENSMUSG00000070985	Acnat1	0	0
ENSMUSG00000060317	Acnat2	0	0
ENSMUSG00000028405	Aco1	1.82	8
ENSMUSG00000022477	Aco2	319.46	226.47
ENSMUSG00000072949	Acot1	0.16	0.45
ENSMUSG00000047565	Acot10	0	0.13
ENSMUSG00000034853	Acot11	0.87	5.29
ENSMUSG00000021620	Acot12	0.02	0
ENSMUSG00000006717	Acot13	214.68	170.44
ENSMUSG00000021226	Acot2	3.79	23.16
ENSMUSG00000021228	Acot3	0	0
ENSMUSG00000052392	Acot4	0	0
ENSMUSG00000042540	Acot5	0	0
ENSMUSG00000043487	Acot6	0.58	0.24
ENSMUSG00000028937	Acot7	16.79	15.75
ENSMUSG00000017307	Acot8	4.36	1.7
ENSMUSG00000025287	Acot9	9.66	21.74
ENSMUSG00000020777	Acox1	20.78	20.93
ENSMUSG00000021751	Acox2	0.14	0
ENSMUSG00000029098	Acox3	3.37	9.45
ENSMUSG00000027380	Acoxl	0.69	0.03
ENSMUSG00000044573	Acp1	12.83	5.05
ENSMUSG00000002103	Acp2	2.12	6.99
ENSMUSG00000001348	Acp5	0.95	0.23
ENSMUSG00000028093	Acp6	7.99	11.11
ENSMUSG00000043587	Acpl2	0.28	0.78
ENSMUSG00000032561	Acpp	0	0
ENSMUSG00000012777	Acpt	0	0
ENSMUSG00000022622	Acr	0	0.4
ENSMUSG00000072770	Acrbp	0.2	36.27
ENSMUSG00000032110	Acrv1	0	0
ENSMUSG00000032281	Acsbg1	0.1	1.08
ENSMUSG00000024207	Acsbg2	0	0
ENSMUSG00000076435	Acsf2	0.5	0.11
ENSMUSG00000015016	Acsf3	3.91	3.37
ENSMUSG00000018796	Acsl1	26.16	32.57
ENSMUSG00000032883	Acsl3	1.82	16.83
ENSMUSG00000031278	Acsl4	2.02	11.14
ENSMUSG00000024981	Acsl5	1.73	15.89
ENSMUSG00000020333	Acsl6	5.09	3.58
ENSMUSG00000033533	Acsm1	0	0
ENSMUSG00000030945	Acsm2	0	0
ENSMUSG00000030935	Acsm3	0.03	0
ENSMUSG00000047026	Acsm4	0	0
ENSMUSG00000030972	Acsm5	0	0
ENSMUSG00000027452	Acss1	4.49	24.41
ENSMUSG00000027605	Acss2	5.19	9.07
ENSMUSG00000035948	Acss3	0.03	1.34
ENSMUSG00000031972	Acta1	22724.2	7363.03
ENSMUSG00000035783	Acta2	25.84	19.38
ENSMUSG00000029580	Actb	74.5	1044.18
ENSMUSG00000055194	Actbl2	0	0
ENSMUSG00000068614	Actc1	69.22	54.65
ENSMUSG00000062825	Actg1	75.92	431.36
ENSMUSG00000059430	Actg2	0.28	0.41
ENSMUSG00000027671	Actl6a	6.25	29.92
ENSMUSG00000029712	Actl6b	0	0
ENSMUSG00000070979	Actl7a	0	0
ENSMUSG00000070980	Actl7b	0.05	0.07
ENSMUSG00000092519	Actl9	0	0
ENSMUSG00000015143	Actn1	0.76	4.01
ENSMUSG00000052374	Actn2	158.67	163.17
ENSMUSG00000006457	Actn3	3960.4	3828.98
ENSMUSG00000054808	Actn4	4.1	13.2
ENSMUSG00000021076	Actr10	8.06	3.53
ENSMUSG00000025228	Actr1a	19.68	17.48
ENSMUSG00000037351	Actr1b	17.59	8.19
ENSMUSG00000020152	Actr2	5.4	23.49
ENSMUSG00000026341	Actr3	9.31	25.63
ENSMUSG00000056367	Actr3b	2.31	3.86
ENSMUSG00000037761	Actr5	0.64	5.67
ENSMUSG00000019948	Actr6	1.63	11.66
ENSMUSG00000015971	Actr8	9.57	16.54
ENSMUSG00000046615	Actrt1	0	0
ENSMUSG00000051276	Actrt2	0	0
ENSMUSG00000026836	Acvr1	1.6	4.45
ENSMUSG00000000532	Acvr1b	1.65	1.24
ENSMUSG00000026834	Acvr1c	0.01	0.24
ENSMUSG00000052155	Acvr2a	0.93	2.58
ENSMUSG00000061393	Acvr2b	0.3	167.77
ENSMUSG00000000530	Acvrl1	2.11	18.22
ENSMUSG00000023262	Acy1	5.23	15.1
ENSMUSG00000024866	Acy3	0.59	0.13
ENSMUSG00000008822	Acyp1	34.72	39.25
ENSMUSG00000060923	Acyp2	160.53	292.89
ENSMUSG00000017697	Ada	0.22	1.46
ENSMUSG00000027719	Adad1	0	0
ENSMUSG00000024266	Adad2	0	0
ENSMUSG00000027259	Adal	3.87	5.4
ENSMUSG00000054693	Adam10	1.05	10.46
ENSMUSG00000020926	Adam11	0.04	0.21
ENSMUSG00000054555	Adam12	0.01	0.31
ENSMUSG00000028041	Adam15	24.41	315.27
ENSMUSG00000052593	Adam17	5.57	22.16
ENSMUSG00000031552	Adam18	0	0
ENSMUSG00000011256	Adam19	0.31	9.31
ENSMUSG00000072647	Adam1a	0.2	0.81
ENSMUSG00000062438	Adam1b	0	0
ENSMUSG00000022039	Adam2	0	0
ENSMUSG00000008438	Adam21	0	0.19
ENSMUSG00000040537	Adam22	0.18	2.88
ENSMUSG00000025964	Adam23	0.3	4.89
ENSMUSG00000046723	Adam24	0	0
ENSMUSG00000071937	Adam25	0	0
ENSMUSG00000048516	Adam26a	0	0
ENSMUSG00000063900	Adam26b	0	0
ENSMUSG00000014725	Adam28	0	0
ENSMUSG00000046258	Adam29	0	0
ENSMUSG00000031553	Adam3	0	0
ENSMUSG00000043468	Adam30	0	0
ENSMUSG00000037437	Adam32	0	6.53
ENSMUSG00000027318	Adam33	0.59	35.91
ENSMUSG00000079058	Adam34	0	0
ENSMUSG00000054033	Adam39	0	0
ENSMUSG00000072972	Adam4	0.05	0.22
ENSMUSG00000031554	Adam5	0	0
ENSMUSG00000043945	Adam6a	0	0
ENSMUSG00000051804	Adam6b	0	0
ENSMUSG00000022056	Adam7	0	0
ENSMUSG00000025473	Adam8	0.02	3.95
ENSMUSG00000031555	Adam9	7.06	5.62
ENSMUSG00000022057	Adamdec1	0	0
ENSMUSG00000022893	Adamts1	1.6	18.35
ENSMUSG00000024299	Adamts10	0.82	38.46
ENSMUSG00000047497	Adamts12	0.01	0.08
ENSMUSG00000014852	Adamts13	0	0.28
ENSMUSG00000059901	Adamts14	0.17	2.56
ENSMUSG00000033453	Adamts15	0.22	6.34
ENSMUSG00000049538	Adamts16	0	0.56
ENSMUSG00000058145	Adamts17	0.04	0.51
ENSMUSG00000053399	Adamts18	0	0.89
ENSMUSG00000053441	Adamts19	0.03	0.02
ENSMUSG00000036545	Adamts2	0.96	3.42
ENSMUSG00000022449	Adamts20	0.36	3.75
ENSMUSG00000043635	Adamts3	0.09	1.44
ENSMUSG00000006403	Adamts4	0.04	0.12
ENSMUSG00000022894	Adamts5	0.67	3.12
ENSMUSG00000046169	Adamts6	0.1	0.4
ENSMUSG00000032363	Adamts7	0.18	3.47
ENSMUSG00000031994	Adamts8	2.17	0.18
ENSMUSG00000030022	Adamts9	0.29	6.16
ENSMUSG00000066113	Adamtsl1	0.38	7.1
ENSMUSG00000036040	Adamtsl2	1.56	29.37
ENSMUSG00000070469	Adamtsl3	0.17	2.31
ENSMUSG00000015850	Adamtsl4	2	21.13
ENSMUSG00000043822	Adamtsl5	12.08	24.5
ENSMUSG00000056413	Adap1	0.67	3.3
ENSMUSG00000020709	Adap2	0.32	2.74
ENSMUSG00000027951	Adar	0.56	4.36
ENSMUSG00000020262	Adarb1	0.67	12.74
ENSMUSG00000052551	Adarb2	0.02	0.02
ENSMUSG00000031949	Adat1	0.32	5.86
ENSMUSG00000019808	Adat2	0.97	2.01
ENSMUSG00000035370	Adat3	0.32	0.51
ENSMUSG00000028789	Adc	1.29	0.28
ENSMUSG00000021044	Adck1	7.45	9.12
ENSMUSG00000046947	Adck2	2.92	2.71
ENSMUSG00000026489	Adck3	142.47	238.13
ENSMUSG00000003762	Adck4	1.69	13.03
ENSMUSG00000022550	Adck5	3.71	14.3
ENSMUSG00000020431	Adcy1	0.11	0.26
ENSMUSG00000026567	Adcy10	0	1.61
ENSMUSG00000021536	Adcy2	5.87	15.28
ENSMUSG00000020654	Adcy3	0.1	0.39
ENSMUSG00000022220	Adcy4	1.19	32.9
ENSMUSG00000022840	Adcy5	0.13	0.43
ENSMUSG00000022994	Adcy6	2.1	31.35
ENSMUSG00000031659	Adcy7	0.23	9.06
ENSMUSG00000022376	Adcy8	0.03	0
ENSMUSG00000005580	Adcy9	0.08	12.89
ENSMUSG00000024256	Adcyap1	0	0
ENSMUSG00000029778	Adcyap1r1	0.13	1.53
ENSMUSG00000029106	Add1	12.14	34.25
ENSMUSG00000030000	Add2	0	0
ENSMUSG00000025026	Add3	2.45	15.06
ENSMUSG00000074207	Adh1	13.13	58.57
ENSMUSG00000037797	Adh4	0	0
ENSMUSG00000028138	Adh5	30.68	14.51
ENSMUSG00000053054	Adh6a	0	0
ENSMUSG00000074206	Adh6b	0	0
ENSMUSG00000090306	Adh6-ps1	0	0
ENSMUSG00000055301	Adh7	0.08	0.4
ENSMUSG00000025911	Adhfe1	11.65	13.13
ENSMUSG00000020629	Adi1	26.98	7.48
ENSMUSG00000044405	Adig	4.83	3.34
ENSMUSG00000022878	Adipoq	1.83	0.24
ENSMUSG00000026457	Adipor1	77.57	44
ENSMUSG00000030168	Adipor2	19.84	17.51
ENSMUSG00000039197	Adk	24.14	11.73
ENSMUSG00000030790	Adm	1.03	2.22
ENSMUSG00000054136	Adm2	0.08	0
ENSMUSG00000051149	Adnp	0	0
ENSMUSG00000053950	Adnp2	0.4	0.53
ENSMUSG00000057134	Ado	5.24	7.02
ENSMUSG00000042429	Adora1	0.25	2.21
ENSMUSG00000020178	Adora2a	0.25	1.17
ENSMUSG00000018500	Adora2b	0.16	0.26
ENSMUSG00000000562	Adora3	0	0
ENSMUSG00000074344	Adora3	0.28	0
ENSMUSG00000025236	Adpgk	1.25	1.09
ENSMUSG00000002844	Adprh	16.15	4.6
ENSMUSG00000031448	Adprhl1	23.58	8.78
ENSMUSG00000042558	Adprhl2	4.33	18.07
ENSMUSG00000045875	Adra1a	0.11	0.28
ENSMUSG00000050541	Adra1b	0	0
ENSMUSG00000027335	Adra1d	0.08	0
ENSMUSG00000033717	Adra2a	0.16	0.89
ENSMUSG00000058620	Adra2b	0.15	0.7
ENSMUSG00000045318	Adra2c	0.11	0.99
ENSMUSG00000035283	Adrb1	0	0.11
ENSMUSG00000045730	Adrb2	5.36	36.63
ENSMUSG00000031489	Adrb3	0.05	0.53
ENSMUSG00000024858	Adrbk1	17.39	31.29
ENSMUSG00000042249	Adrbk2	0.28	3.23
ENSMUSG00000039041	Adrm1	73.81	101.6
ENSMUSG00000022407	Adsl	26.64	1.58
ENSMUSG00000015961	Adss	1.93	22.07
ENSMUSG00000011148	Adssl1	518.71	288.92
ENSMUSG00000020473	Aebp1	16.98	15.76
ENSMUSG00000030232	Aebp2	5.57	12.96
ENSMUSG00000030609	Aen	28.32	35.88
ENSMUSG00000054452	Aes	537.91	119.26
ENSMUSG00000044811	AF251705	0.07	0.54
ENSMUSG00000057116	AF366264	0	0
ENSMUSG00000039313	AF529169	0	0
ENSMUSG00000029094	Afap1	0.37	10.37
ENSMUSG00000033032	Afap1l1	7.83	23.82
ENSMUSG00000025083	Afap1l2	0.15	3.12
ENSMUSG00000029313	Aff1	1.24	11.59
ENSMUSG00000031189	Aff2	0	0.43
ENSMUSG00000037138	Aff3	0.41	1.23
ENSMUSG00000049470	Aff4	1.52	8.54
ENSMUSG00000031967	Afg3l1	11.35	31.58
ENSMUSG00000024527	Afg3l2	12.97	20.91
ENSMUSG00000029369	Afm	0	0
ENSMUSG00000017718	Afmid	0.47	4.11
ENSMUSG00000054932	Afp	0	0
ENSMUSG00000049659	Aftph	3.03	30.77
ENSMUSG00000031521	Aga	11.13	6.81
ENSMUSG00000055013	Agap1	0.76	6.26
ENSMUSG00000025422	Agap2	0.18	0.52
ENSMUSG00000023353	Agap3	12.1	90.34
ENSMUSG00000025754	Agbl1	0.2	12.12
ENSMUSG00000040812	Agbl2	0.03	1.33
ENSMUSG00000038836	Agbl3	0.64	0.66
ENSMUSG00000061298	Agbl4	0	0
ENSMUSG00000029165	Agbl5	0.32	4.84
ENSMUSG00000015452	Ager	0	1.38
ENSMUSG00000026159	Agfg1	2.41	4.59
ENSMUSG00000029722	Agfg2	0.47	3.45
ENSMUSG00000021681	Aggf1	3.89	17.26
ENSMUSG00000029916	Agk	1.56	3.43
ENSMUSG00000033400	Agl	39.53	166.93
ENSMUSG00000040706	Agmat	0	0
ENSMUSG00000050103	Agmo	0.43	2.78
ENSMUSG00000034254	Agpat1	29.76	10.79
ENSMUSG00000026922	Agpat2	2.34	0.16
ENSMUSG00000001211	Agpat3	33.88	29.93
ENSMUSG00000023827	Agpat4	1.02	1.51
ENSMUSG00000031467	Agpat5	6.59	12.93
ENSMUSG00000031545	Agpat6	14.87	33.74
ENSMUSG00000029314	Agpat9	0.89	8.14
ENSMUSG00000035878	Agphd1	0.1	0.05
ENSMUSG00000042410	Agps	1.54	8.11
ENSMUSG00000020581	Agr2	0	0
ENSMUSG00000036231	Agr3	0	0
ENSMUSG00000041936	Agrn	2.47	91.39
ENSMUSG00000005705	Agrp	0.28	0
ENSMUSG00000031980	Agt	6.54	0.36
ENSMUSG00000021557	Agtpbp1	13.27	56.93
ENSMUSG00000049115	Agtr1a	0.51	0.26
ENSMUSG00000054988	Agtr1b	0	0
ENSMUSG00000068122	Agtr2	0.02	0
ENSMUSG00000029007	Agtrap	1.88	2.38
ENSMUSG00000026272	Agxt	0	0
ENSMUSG00000089678	Agxt2	0	0
ENSMUSG00000019232	Agxt2l1	0	0
ENSMUSG00000020359	Agxt2l2	6.63	11.61
ENSMUSG00000026491	Ahctf1	4.08	42.93
ENSMUSG00000027597	Ahcy	9.76	4.52
ENSMUSG00000027893	Ahcyl1	5.03	36.36
ENSMUSG00000029772	Ahcyl2	1.99	5.05
ENSMUSG00000037692	Ahdc1	1.22	5.8
ENSMUSG00000019986	Ahi1	0.03	12.89
ENSMUSG00000069833	Ahnak	43.07	197.21
ENSMUSG00000072812	Ahnak2	0.1	1.61
ENSMUSG00000019256	Ahr	0.17	0.13
ENSMUSG00000021575	Ahrr	0	0
ENSMUSG00000021037	Ahsa1	72.49	47.67
ENSMUSG00000020288	Ahsa2	13.03	91.33
ENSMUSG00000022868	Ahsg	0	0
ENSMUSG00000032313	AI118078	0.2	0
ENSMUSG00000035875	AI182371	0	0
ENSMUSG00000050812	AI314180	26.52	99.65
ENSMUSG00000040771	AI314976	17.48	54.57
ENSMUSG00000031534	AI316807	39.2	52.51
ENSMUSG00000038522	AI317395	1.27	2.24
ENSMUSG00000062753	AI413582	1.22	4.73
ENSMUSG00000073854	AI427809	0	0
ENSMUSG00000019737	AI428936	0.09	5.57
ENSMUSG00000074384	AI429214	0	0
ENSMUSG00000071654	AI462493	89.04	180.76
ENSMUSG00000046312	AI464131	13.58	5.94
ENSMUSG00000045165	AI467606	0.3	0.85
ENSMUSG00000047434	AI480653	0.21	0.24
ENSMUSG00000038598	AI481877	0	0
ENSMUSG00000056145	AI504432	0	0
ENSMUSG00000078307	AI593442	0	0
ENSMUSG00000060935	AI597468	2.44	7.15
ENSMUSG00000010290	AI597479	3.76	5.27
ENSMUSG00000074873	AI606181	0.99	27.37
ENSMUSG00000073490	AI607873	0.11	0.92
ENSMUSG00000046807	AI646023	0.04	0.06
ENSMUSG00000034382	AI661453	0.05	0
ENSMUSG00000074195	AI747448	0	0
ENSMUSG00000029875	AI836003	0	0
ENSMUSG00000047423	AI837181	13.86	6.31
ENSMUSG00000024970	AI846148	1.31	2.39
ENSMUSG00000040297	AI848100	0.55	16.39
ENSMUSG00000056383	AI987944	0.32	1.01
ENSMUSG00000040627	Aicda	0	0
ENSMUSG00000024397	Aif1	0.98	5.47
ENSMUSG00000001864	Aif1l	0.8	0.88
ENSMUSG00000036932	Aifm1	17.53	12.53
ENSMUSG00000020085	Aifm2	5.56	21.87
ENSMUSG00000022763	Aifm3	0	0
ENSMUSG00000019806	Aig1	4.43	7.5
ENSMUSG00000019866	Aim1	0.29	1.27
ENSMUSG00000012123	Aim1l	0	0
ENSMUSG00000037860	Aim2	0.12	2.36
ENSMUSG00000028029	Aimp1	124.23	111.62
ENSMUSG00000029610	Aimp2	168.96	166.27
ENSMUSG00000024847	Aip	49.18	38.12
ENSMUSG00000040554	Aipl1	0	0
ENSMUSG00000000731	Aire	0	0
ENSMUSG00000039546	Ajap1	0.11	0
ENSMUSG00000041716	AK010878	0	0
ENSMUSG00000026817	Ak1	680.29	934.61
ENSMUSG00000040729	AK129341	0.02	0.1
ENSMUSG00000078139	AK157302	0.21	0.1
ENSMUSG00000028792	Ak2	20.1	27.82
ENSMUSG00000024782	Ak3	18.91	8.58
ENSMUSG00000028527	Ak4	0.82	2.91
ENSMUSG00000039058	Ak5	0.04	0.12
ENSMUSG00000041323	Ak7	0	0
ENSMUSG00000026807	Ak8	0.09	0
ENSMUSG00000018428	Akap1	9.87	65.7
ENSMUSG00000047804	Akap10	0.63	6.3
ENSMUSG00000022016	Akap11	0.92	6.43
ENSMUSG00000038587	Akap12	0.44	1.36
ENSMUSG00000066406	Akap13	2.88	267.44
ENSMUSG00000036551	Akap14	0	0
ENSMUSG00000059708	Akap17b	0.3	2.18
ENSMUSG00000038729	Akap2	2.17	9.12
ENSMUSG00000030344	Akap3	0	0
ENSMUSG00000050089	Akap4	0	0
ENSMUSG00000021057	Akap5	0.05	0.15
ENSMUSG00000061603	Akap6	1.41	3.4
ENSMUSG00000039166	Akap7	3.46	22.87
ENSMUSG00000024045	Akap8	4.46	72.32
ENSMUSG00000002625	Akap8l	5.65	49.18
ENSMUSG00000040407	Akap9	6.01	185.58
ENSMUSG00000091415	Akd1	0	0
ENSMUSG00000023075	Akirin1	4.97	4.52
ENSMUSG00000028291	Akirin2	19.54	30.9
ENSMUSG00000039158	Akna	0.11	6.86
ENSMUSG00000049565	Aknad1	0.05	0
ENSMUSG00000036500	Akp3	0	0
ENSMUSG00000028692	Akr1a1	130.34	90.5
ENSMUSG00000061758	Akr1b10	29.69	14.03
ENSMUSG00000001642	Akr1b3	233.56	529.6
ENSMUSG00000052131	Akr1b7	0	0.25
ENSMUSG00000029762	Akr1b8	0.5	0.99
ENSMUSG00000021211	Akr1c12	0	0
ENSMUSG00000021213	Akr1c13	0.06	1.21
ENSMUSG00000033715	Akr1c14	0.11	1.07
ENSMUSG00000021214	Akr1c18	0	0
ENSMUSG00000071551	Akr1c19	0.12	9.82
ENSMUSG00000054757	Akr1c20	0	0
ENSMUSG00000021207	Akr1c21	0	0
ENSMUSG00000021210	Akr1c6	0	0
ENSMUSG00000025955	Akr1cl	0	0
ENSMUSG00000038641	Akr1d1	0	0
ENSMUSG00000045410	Akr1e1	7.35	16
ENSMUSG00000028743	Akr7a5	40.83	16.89
ENSMUSG00000001729	Akt1	13.31	10.95
ENSMUSG00000011096	Akt1s1	82.98	22.54
ENSMUSG00000004056	Akt2	89.4	142.46
ENSMUSG00000019699	Akt3	0.65	4.54
ENSMUSG00000031667	Aktip	31.56	82.72
ENSMUSG00000090983	AL451076.1	0	0
ENSMUSG00000090625	AL593857.1	0.43	0
ENSMUSG00000090599	AL626783.1	0	0.33
ENSMUSG00000028393	Alad	24.44	29.67
ENSMUSG00000032786	Alas1	37.69	39.99
ENSMUSG00000025270	Alas2	2.82	12.84
ENSMUSG00000029368	Alb	0	0
ENSMUSG00000022636	Alcam	0	0.03
ENSMUSG00000007833	Aldh16a1	5.79	56.85
ENSMUSG00000025007	Aldh18a1	0.84	1.45
ENSMUSG00000053279	Aldh1a1	43.61	16.75
ENSMUSG00000013584	Aldh1a2	0.31	2.28
ENSMUSG00000015134	Aldh1a3	0.16	0.4
ENSMUSG00000024747	Aldh1a7	0.38	0.41
ENSMUSG00000035561	Aldh1b1	0.31	0
ENSMUSG00000030088	Aldh1l1	1.78	19.86
ENSMUSG00000020256	Aldh1l2	0.32	5.2
ENSMUSG00000029455	Aldh2	24.16	11.97
ENSMUSG00000019102	Aldh3a1	0.08	0.51
ENSMUSG00000010025	Aldh3a2	1.29	1.58
ENSMUSG00000024885	Aldh3b1	1.1	10.19
ENSMUSG00000075296	Aldh3b2	0.03	0
ENSMUSG00000028737	Aldh4a1	17.44	20.48
ENSMUSG00000035936	Aldh5a1	1.34	5.27
ENSMUSG00000021238	Aldh6a1	10.63	28.86
ENSMUSG00000053644	Aldh7a1	11.84	9.76
ENSMUSG00000037542	Aldh8a1	0	0.58
ENSMUSG00000026687	Aldh9a1	0.56	6.04
ENSMUSG00000030695	Aldoa	14200.2	2834.93
ENSMUSG00000059343	Aldoart1	0.38	0
ENSMUSG00000063129	Aldoart2	0	0
ENSMUSG00000028307	Aldob	0.52	0
ENSMUSG00000017390	Aldoc	0.34	0.06
ENSMUSG00000039427	Alg1	7.61	34.73
ENSMUSG00000075470	Alg10b	0.2	3.28
ENSMUSG00000063362	Alg11	0.66	0.74
ENSMUSG00000035845	Alg12	0.69	2.17
ENSMUSG00000041718	Alg13	1.3	9.01
ENSMUSG00000039887	Alg14	2.92	0.64
ENSMUSG00000039740	Alg2	2.44	3.64
ENSMUSG00000033809	Alg3	12.03	1.72
ENSMUSG00000036632	Alg5	5.89	7.09
ENSMUSG00000073792	Alg6	0.67	6.76
ENSMUSG00000035704	Alg8	1.84	7.39
ENSMUSG00000032059	Alg9	3.38	6.79
ENSMUSG00000055471	Alk	0	0
ENSMUSG00000079036	Alkbh1	0.75	9.54
ENSMUSG00000093477	Alkbh1	0.07	1.45
ENSMUSG00000044339	Alkbh2	0.83	1.97
ENSMUSG00000040174	Alkbh3	37.46	31.28
ENSMUSG00000039754	Alkbh4	2.2	1.66
ENSMUSG00000042650	Alkbh5	14.68	41.54
ENSMUSG00000042831	Alkbh6	22.56	9.16
ENSMUSG00000002661	Alkbh7	40.14	34.83
ENSMUSG00000025899	Alkbh8	0.73	4.34
ENSMUSG00000020636	Allc	0	0
ENSMUSG00000063810	Alms1	0.01	1.17
ENSMUSG00000000320	Alox12	0.09	0.03
ENSMUSG00000032807	Alox12b	0.09	0
ENSMUSG00000018907	Alox12e	0.06	0
ENSMUSG00000018924	Alox15	0	1.7
ENSMUSG00000025701	Alox5	0.09	0.68
ENSMUSG00000060063	Alox5ap	4.98	7.66
ENSMUSG00000020891	Alox8	0	0
ENSMUSG00000020892	Aloxe3	0	0
ENSMUSG00000079440	Alpi	0	0
ENSMUSG00000028028	Alpk1	0.1	0.87
ENSMUSG00000032845	Alpk2	4.11	5.26
ENSMUSG00000038763	Alpk3	19.07	54.78
ENSMUSG00000028766	Alpl	3.05	5.51
ENSMUSG00000026246	Alppl2	0	0
ENSMUSG00000026024	Als2	1.1	1.75
ENSMUSG00000044037	Als2cl	0.38	17.72
ENSMUSG00000047383	Als2cr11	0	1.13
ENSMUSG00000072295	Als2cr11	0	0
ENSMUSG00000047528	Als2cr12	0	0
ENSMUSG00000038079	Als2cr4	0.59	4.85
ENSMUSG00000036602	Alx1	0	0
ENSMUSG00000092348	Alx1	0	0
ENSMUSG00000014603	Alx3	0	0
ENSMUSG00000092379	Alx3	0	0
ENSMUSG00000040310	Alx4	0.04	0
ENSMUSG00000025134	Alyref	12.14	21.27
ENSMUSG00000060244	Alyref2	1.56	6.35
ENSMUSG00000018776	Amac1	0	0
ENSMUSG00000022244	Amacr	5.84	3.95
ENSMUSG00000029288	Ambn	0	0
ENSMUSG00000028356	Ambp	0	0
ENSMUSG00000040506	Ambra1	1.24	13.55
ENSMUSG00000075232	Amd1	171.03	326.79
ENSMUSG00000063953	Amd2	0.16	0.56
ENSMUSG00000015890	Amdhd1	0	0
ENSMUSG00000036820	Amdhd2	8.5	96.21
ENSMUSG00000060096	Amd-ps3	0	0.32
ENSMUSG00000031354	Amelx	0	0
ENSMUSG00000031751	Amfr	23.97	18.42
ENSMUSG00000035262	Amh	0.04	0
ENSMUSG00000023047	Amhr2	10.24	8.11
ENSMUSG00000048534	Amica1	0	0.57
ENSMUSG00000050947	Amigo1	6.31	4.94
ENSMUSG00000048218	Amigo2	0.43	0.67
ENSMUSG00000032593	Amigo3	0.99	2.62
ENSMUSG00000042225	Ammecr1	0.23	2.05
ENSMUSG00000041915	Ammecr1l	0.19	14.37
ENSMUSG00000021278	Amn	0.04	0
ENSMUSG00000068250	Amn1	3.6	5.67
ENSMUSG00000041688	Amot	5.38	13.53
ENSMUSG00000013076	Amotl1	16.18	316.57
ENSMUSG00000032531	Amotl2	0.76	12.53
ENSMUSG00000070385	Ampd1	791.03	2428.82
ENSMUSG00000027889	Ampd2	0.91	6.74
ENSMUSG00000005686	Ampd3	0.86	5.35
ENSMUSG00000021314	Amph	0.13	1.36
ENSMUSG00000032607	Amt	0.06	0
ENSMUSG00000029282	Amtn	0	0
ENSMUSG00000074264	Amy1	16.21	146.08
ENSMUSG00000070360	Amy2a1	0	0
ENSMUSG00000079850	Amy2a2	0.02	0.32
ENSMUSG00000074266	Amy2a3	0.02	0
ENSMUSG00000074267	Amy2a4	0	0
ENSMUSG00000074268	Amy2a5	0	0
ENSMUSG00000050022	Amz1	0.03	0.08
ENSMUSG00000020610	Amz2	50.78	34.31
ENSMUSG00000014355	Anapc1	1.48	12.78
ENSMUSG00000036977	Anapc10	0.74	0.29
ENSMUSG00000025135	Anapc11	29.08	36.22
ENSMUSG00000035048	Anapc13	310.65	206.55
ENSMUSG00000020107	Anapc16	25.81	21.78
ENSMUSG00000026965	Anapc2	7.14	28.17
ENSMUSG00000029176	Anapc4	24.08	200.31
ENSMUSG00000029472	Anapc5	187.21	206.36
ENSMUSG00000029466	Anapc7	3.5	3.5
ENSMUSG00000072115	Ang	0.65	0.78
ENSMUSG00000047894	Ang2	0	0
ENSMUSG00000060615	Ang4	0	0
ENSMUSG00000053961	Ang5	0	0
ENSMUSG00000072598	Ang6	0	0
ENSMUSG00000021257	Angel1	1.37	1.62
ENSMUSG00000026634	Angel2	4.45	27.72
ENSMUSG00000022309	Angpt1	1.11	4.2
ENSMUSG00000031465	Angpt2	0.46	0.78
ENSMUSG00000027460	Angpt4	0.21	0.6
ENSMUSG00000033544	Angptl1	0.6	0.73
ENSMUSG00000004105	Angptl2	10.64	9.77
ENSMUSG00000028553	Angptl3	0	1
ENSMUSG00000002289	Angptl4	0.19	0.33
ENSMUSG00000038742	Angptl6	4.37	0.17
ENSMUSG00000028989	Angptl7	3.25	8.29
ENSMUSG00000022265	Ank	34.03	30.38
ENSMUSG00000031543	Ank1	167.04	135.03
ENSMUSG00000032826	Ank2	2.11	13.93
ENSMUSG00000069601	Ank3	2.84	10.3
ENSMUSG00000039342	Ankar	0	0
ENSMUSG00000066510	Ankdd1a	0	0
ENSMUSG00000047117	Ankdd1b	0.39	1.69
ENSMUSG00000047773	Ankfn1	0	0
ENSMUSG00000020790	Ankfy1	0.94	8.09
ENSMUSG00000024483	Ankhd1	3.59	747.7
ENSMUSG00000040351	Ankib1	0.58	6.12
ENSMUSG00000032257	Ankk1	0	0
ENSMUSG00000046295	Ankle1	0	0
ENSMUSG00000029501	Ankle2	1.93	3.53
ENSMUSG00000034212	Ankmy1	0	0
ENSMUSG00000036188	Ankmy2	1.52	8.06
ENSMUSG00000021661	Ankra2	4.56	11.24
ENSMUSG00000024803	Ankrd1	7.44	16.71
ENSMUSG00000031508	Ankrd10	3.63	46.31
ENSMUSG00000035569	Ankrd11	1.52	49.9
ENSMUSG00000034647	Ankrd12	0.67	52.47
ENSMUSG00000041870	Ankrd13a	4.11	4.03
ENSMUSG00000037907	Ankrd13b	3.68	3.32
ENSMUSG00000039988	Ankrd13c	1.18	3.33
ENSMUSG00000005986	Ankrd13d	0.54	2.05
ENSMUSG00000047909	Ankrd16	9.77	41.71
ENSMUSG00000055204	Ankrd17	1.28	189.51
[truncated: 20,383 more rows]

## Sheet: phosphatidylinositol signaling 
Probe	Gene description (Source dataset)	Rank in gene list	Rank metric score	Running ES	Core enrichement	Input RNA (TPM)	IP RNA (TPM)
ITPR2	inositol 1,4,5-trisphosphate receptor type 2 [Source:HGNC Symbol;Acc:HGNC:6181]	1	4.99295	0.0206904	Yes	0.13	184.2
DGKH	diacylglycerol kinase eta [Source:HGNC Symbol;Acc:HGNC:2854]	68	4.92918	0.0372196	Yes	0.05	7.01
PLCB1	phospholipase C beta 1 [Source:HGNC Symbol;Acc:HGNC:15917]	152	4.89292	0.052579	Yes	0.13	12.01
PIKFYVE	phosphoinositide kinase, FYVE-type zinc finger containing [Source:HGNC Symbol;Acc:HGNC:23785]	209	4.86667	0.0897701	Yes	0.03	2.22
PRKCB	protein kinase C beta [Source:HGNC Symbol;Acc:HGNC:9395]	299	4.82857	0.104502	Yes	0.03	1.72
INPP4B	inositol polyphosphate-4-phosphatase type II B [Source:HGNC Symbol;Acc:HGNC:6075]	308	4.82472	0.124074	Yes	0.2	11.21
PLCB2	phospholipase C beta 2 [Source:HGNC Symbol;Acc:HGNC:9055]	510	4.7479	0.131758	Yes	0.03	1.16
PLCB4	phospholipase C beta 4 [Source:HGNC Symbol;Acc:HGNC:9059]	692	4.68022	0.140359	Yes	3.24	98.08
DGKQ	diacylglycerol kinase theta [Source:HGNC Symbol;Acc:HGNC:2856]	780	4.64455	0.154447	Yes	0.45	12.21
DGKZ	diacylglycerol kinase zeta [Source:HGNC Symbol;Acc:HGNC:2857]	788	4.64267	0.173322	Yes	9.56	257.98
PIK3R5	phosphoinositide-3-kinase regulatory subunit 5 [Source:HGNC Symbol;Acc:HGNC:30035]	790	4.64143	0.192551	Yes	0.09	2.42
PLCG1	phospholipase C gamma 1 [Source:HGNC Symbol;Acc:HGNC:9065]	822	4.62921	0.209932	Yes	1.96	50.9
ITPR3	inositol 1,4,5-trisphosphate receptor type 3 [Source:HGNC Symbol;Acc:HGNC:6182]	880	4.6066	0.22566	Yes	0.31	7.57
PLCE1	phospholipase C epsilon 1 [Source:HGNC Symbol;Acc:HGNC:17175]	927	4.58621	0.241962	Yes	0.12	2.78
OCRL	OCRL inositol polyphosphate-5-phosphatase [Source:HGNC Symbol;Acc:HGNC:8108]	978	4.56631	0.257943	Yes	1.56	34.41
INPP5D	inositol polyphosphate-5-phosphatase D [Source:HGNC Symbol;Acc:HGNC:6079]	983	4.56522	0.276675	Yes	0.17	3.74
SYNJ1	synaptojanin 1 [Source:HGNC Symbol;Acc:HGNC:11503]	1011	4.55605	0.293992	Yes	1.41	30.35
PLCG2	phospholipase C gamma 2 [Source:NCBI gene;Acc:5336]	1025	4.55285	0.312134	Yes	0.11	2.35
PIK3C2B	phosphatidylinositol-4-phosphate 3-kinase catalytic subunit type 2 beta [Source:HGNC Symbol;Acc:HGNC:8972]	1221	4.48849	0.319099	Yes	0.8	14.84
PI4KA	phosphatidylinositol 4-kinase alpha [Source:HGNC Symbol;Acc:HGNC:8983]	1474	4.39499	0.322259	Yes	9.42	146.28
PLCD3	phospholipase C delta 3 [Source:HGNC Symbol;Acc:HGNC:9061]	1492	4.38532	0.339465	Yes	1.34	20.46
PLCD1	phospholipase C delta 1 [Source:HGNC Symbol;Acc:HGNC:9060]	1761	4.28503	0.341209	Yes	2.23	28.96
DGKD	diacylglycerol kinase delta [Source:HGNC Symbol;Acc:HGNC:2851]	1835	4.25443	0.354514	Yes	3.66	45.43
DGKA	diacylglycerol kinase alpha [Source:HGNC Symbol;Acc:HGNC:2849]	1851	4.24812	0.37127	Yes	1.4	17.22
PIK3R1	phosphoinositide-3-kinase regulatory subunit 1 [Source:HGNC Symbol;Acc:HGNC:8979]	1852	4.24726	0.388922	Yes	1.58	19.41
PIK3C2A	phosphatidylinositol-4-phosphate 3-kinase catalytic subunit type 2 alpha [Source:HGNC Symbol;Acc:HGNC:8971]	1871	4.24012	0.405464	Yes	0.25	3.04
PIK3CD	phosphatidylinositol-4,5-bisphosphate 3-kinase catalytic subunit delta [Source:HGNC Symbol;Acc:HGNC:8977]	1885	4.23186	0.422272	Yes	1.63	19.59
PLCD4	phospholipase C delta 4 [Source:HGNC Symbol;Acc:HGNC:9062]	1898	4.22869	0.439127	Yes	13.71	164.04
PIP5K1A	phosphatidylinositol-4-phosphate 5-kinase type 1 alpha [Source:HGNC Symbol;Acc:HGNC:8994]	1976	4.19655	0.451952	Yes	4.01	45.9
DGKE	diacylglycerol kinase epsilon [Source:HGNC Symbol;Acc:HGNC:2852]	1994	4.18963	0.468345	Yes	0.5	5.67
INPP4A	inositol polyphosphate-4-phosphatase type I A [Source:HGNC Symbol;Acc:HGNC:6074]	2049	4.17058	0.482441	Yes	2.12	23.44
PLCB3	phospholipase C beta 3 [Source:HGNC Symbol;Acc:HGNC:9056]	2073	4.16446	0.498369	Yes	1.58	17.33
PIP5K1B	phosphatidylinositol-4-phosphate 5-kinase type 1 beta [Source:HGNC Symbol;Acc:HGNC:8995]	2198	4.11765	0.508049	Yes	0.03	0.31
SYNJ2	synaptojanin 2 [Source:HGNC Symbol;Acc:HGNC:11504]	2480	4.00314	0.507843	Yes	2.54	22.94
PIK3R3	phosphoinositide-3-kinase regulatory subunit 3 [Source:HGNC Symbol;Acc:HGNC:8981]	2716	3.91182	0.510014	Yes	0.58	4.75
CDS1	CDP-diacylglycerol synthase 1 [Source:HGNC Symbol;Acc:HGNC:1800]	2819	3.85542	0.519922	Yes	0.19	1.47
PIP4K2A	phosphatidylinositol-5-phosphate 4-kinase type 2 alpha [Source:HGNC Symbol;Acc:HGNC:8997]	2856	3.83549	0.533705	Yes	0.63	4.78
ITPR1	inositol 1,4,5-trisphosphate receptor type 1 [Source:HGNC Symbol;Acc:HGNC:6180]	2898	3.81811	0.547115	Yes	8.46	63.12
INPP5B	inositol polyphosphate-5-phosphatase B [Source:HGNC Symbol;Acc:HGNC:6077]	3279	3.64542	0.539487	Yes	1.7	10.85
CDS2	CDP-diacylglycerol synthase 2 [Source:HGNC Symbol;Acc:HGNC:1801]	3286	3.64054	0.554257	Yes	2.22	14.11
PIK3CB	phosphatidylinositol-4,5-bisphosphate 3-kinase catalytic subunit beta [Source:HGNC Symbol;Acc:HGNC:8976]	3295	3.63793	0.568897	Yes	0.79	5.01
PIK3CA	phosphatidylinositol-4,5-bisphosphate 3-kinase catalytic subunit alpha [Source:HGNC Symbol;Acc:HGNC:8975]	3341	3.61668	0.58123	Yes	4.28	26.66
PIK3C3	phosphatidylinositol 3-kinase catalytic subunit type 3 [Source:HGNC Symbol;Acc:HGNC:8974]	3870	3.37951	0.563626	No	3.1	16.03
IPPK	inositol-pentakisphosphate 2-kinase [Source:HGNC Symbol;Acc:HGNC:14645]	3889	3.36812	0.576545	No	1.72	8.82
PIP4K2C	phosphatidylinositol-5-phosphate 4-kinase type 2 gamma [Source:HGNC Symbol;Acc:HGNC:23786]	4344	3.15171	0.56243	No	3.46	15.26
ITPKB	inositol-trisphosphate 3-kinase B [Source:HGNC Symbol;Acc:HGNC:6179]	4534	3.07416	0.563877	No	1.61	6.75
INPPL1	inositol polyphosphate phosphatase like 1 [Source:HGNC Symbol;Acc:HGNC:6080]	4735	2.9768	0.56426	No	8.72	34.38
PRKCA	protein kinase C alpha [Source:HGNC Symbol;Acc:HGNC:9393]	5064	2.80272	0.556247	No	3.23	11.47
PTEN	phosphatase and tensin homolog [Source:HGNC Symbol;Acc:HGNC:9588]	5236	2.71759	0.557291	No	3.75	12.68
IMPA1	inositol monophosphatase 1 [Source:HGNC Symbol;Acc:HGNC:6050]	5751	2.44644	0.536649	No	4.41	12.86
INPP5K	inositol polyphosphate-5-phosphatase K [Source:HGNC Symbol;Acc:HGNC:33882]	6265	2.17373	0.514933	No	9.81	24.9
DGKB	diacylglycerol kinase beta [Source:HGNC Symbol;Acc:HGNC:2850]	6540	2.02381	0.506919	No	0	0.68
CALM2	calmodulin 2 [Source:HGNC Symbol;Acc:HGNC:1445]	6767	1.8939	0.501244	No	93.27	207.01
CALM1	calmodulin 1 [Source:HGNC Symbol;Acc:HGNC:1442]	7138	1.6984	0.486124	No	60	121.73
DGKG	diacylglycerol kinase gamma [Source:HGNC Symbol;Acc:HGNC:2853]	7294	1.62162	0.483572	No	0	0.48
IMPA2	inositol monophosphatase 2 [Source:HGNC Symbol;Acc:HGNC:6051]	7424	1.52921	0.482195	No	1.01	1.9
CDIPT	CDP-diacylglycerol--inositol 3-phosphatidyltransferase [Source:HGNC Symbol;Acc:HGNC:1769]	7974	1.2307	0.454402	No	13.43	22.2
ITPK1	inositol-tetrakisphosphate 1-kinase [Source:HGNC Symbol;Acc:HGNC:6177]	8398	0.976231	0.433104	No	2.37	3.52
INPP5J	inositol polyphosphate-5-phosphatase J [Source:HGNC Symbol;Acc:HGNC:8956]	9112	0.546219	0.392636	No	1.06	1.32
PIP4K2B	phosphatidylinositol-5-phosphate 4-kinase type 2 beta [Source:HGNC Symbol;Acc:HGNC:8998]	9182	0.502431	0.390588	No	5.55	6.79
PIP5K1C	phosphatidylinositol-4-phosphate 5-kinase type 1 gamma [Source:HGNC Symbol;Acc:HGNC:8996]	9304	0.446293	0.38519	No	3.01	3.6
INPP5A	inositol polyphosphate-5-phosphatase A [Source:HGNC Symbol;Acc:HGNC:6076]	9443	0.368181	0.378448	No	34.47	39.95
CALML3	calmodulin like 3 [Source:HGNC Symbol;Acc:HGNC:1452]	10541	0	0.312693	No	0	0
ITPKA	inositol-trisphosphate 3-kinase A [Source:HGNC Symbol;Acc:HGNC:6178]	10736	0	0.301064	No	0	0
PIK3C2G	phosphatidylinositol-4-phosphate 3-kinase catalytic subunit type 2 gamma [Source:HGNC Symbol;Acc:HGNC:8973]	12197	0	0.21355	No	0	0
PLCZ1	phospholipase C zeta 1 [Source:HGNC Symbol;Acc:HGNC:19218]	12883	0	0.17249	No	0	0
PIK3CG	phosphatidylinositol-4,5-bisphosphate 3-kinase catalytic subunit gamma [Source:HGNC Symbol;Acc:HGNC:8978]	13298	-0.049505	0.14788	No	0.01	0
DGKI	diacylglycerol kinase iota [Source:HGNC Symbol;Acc:HGNC:2855]	13475	-0.0980392	0.137738	No	0.02	0
INPP1	inositol polyphosphate-1-phosphatase [Source:HGNC Symbol;Acc:HGNC:6071]	14774	-0.766871	0.0631212	No	0.94	0.69
INPP5E	inositol polyphosphate-5-phosphatase E [Source:HGNC Symbol;Acc:HGNC:21474]	16221	-2.5	-0.013164	No	4.56	1.52
CALM3	calmodulin 3 [Source:HGNC Symbol;Acc:HGNC:1449]	16300	-2.71055	-0.00657458	No	103.09	30.61
PI4KB	phosphatidylinositol 4-kinase beta [Source:HGNC Symbol;Acc:HGNC:8984]	16752	-4.85423	0.000239905	No	3.38	0.05

## Sheet: ECM receptor interaction
Probe	Gene description (Source dataset)	Rank in gene list	Rank metric score	Running ES	Core enrichement	Input RNA (TPM)	IP RNA (TPM)
ITGA2B	integrin subunit alpha 2b [Source:HGNC Symbol;Acc:HGNC:6138]	58	4.93901	0.0170995	Yes	0.25	40.74
ITGA10	integrin subunit alpha 10 [Source:HGNC Symbol;Acc:HGNC:6135]	240	4.85447	0.02647	Yes	0.07	4.74
COL11A1	collagen type XI alpha 1 chain [Source:HGNC Symbol;Acc:HGNC:2186]	313	4.82437	0.0422522	Yes	0.16	8.95
ITGB8	integrin subunit beta 8 [Source:HGNC Symbol;Acc:HGNC:6163]	339	4.81482	0.0608133	Yes	0.01	0.53
LAMA5	laminin subunit alpha 5 [Source:HGNC Symbol;Acc:HGNC:6485]	340	4.81475	0.0808736	Yes	4.75	251.66
ITGB3	integrin subunit beta 3 [Source:HGNC Symbol;Acc:HGNC:6156]	457	4.76608	0.0937741	Yes	0.08	3.34
COL5A1	collagen type V alpha 1 chain [Source:HGNC Symbol;Acc:HGNC:2209]	528	4.74079	0.109328	Yes	1.26	47.35
AGRN	agrin [Source:HGNC Symbol;Acc:HGNC:329]	534	4.73684	0.128764	Yes	2.47	91.39
ITGB7	integrin subunit beta 7 [Source:HGNC Symbol;Acc:HGNC:6162]	544	4.73384	0.147947	Yes	0.21	7.68
THBS1	thrombospondin 1 [Source:HGNC Symbol;Acc:HGNC:11785]	821	4.62926	0.150682	Yes	0.37	9.61
LAMA3	laminin subunit alpha 3 [Source:HGNC Symbol;Acc:HGNC:6483]	865	4.6124	0.16732	Yes	0.05	1.24
ITGB4	integrin subunit beta 4 [Source:HGNC Symbol;Acc:HGNC:6158]	890	4.60317	0.185059	Yes	0.35	8.47
ITGA1	integrin subunit alpha 1 [Source:HGNC Symbol;Acc:HGNC:6134]	990	4.56318	0.198134	Yes	0.28	6.13
COL2A1	collagen type II alpha 1 chain [Source:HGNC Symbol;Acc:HGNC:2200]	998	4.56044	0.216715	Yes	0.04	0.87
COL5A3	collagen type V alpha 3 chain [Source:HGNC Symbol;Acc:HGNC:14864]	1112	4.52405	0.228787	Yes	1.85	37.02
ITGA9	integrin subunit alpha 9 [Source:HGNC Symbol;Acc:HGNC:6145]	1115	4.52381	0.247515	Yes	0.14	2.8
RELN	reelin [Source:HGNC Symbol;Acc:HGNC:9957]	1296	4.46249	0.255312	Yes	0.48	8.45
COL11A2	collagen type XI alpha 2 chain [Source:HGNC Symbol;Acc:HGNC:2187]	1383	4.43118	0.268617	Yes	0.81	13.43
THBS3	thrombospondin 3 [Source:HGNC Symbol;Acc:HGNC:11787]	1476	4.39409	0.281407	Yes	3.65	56.59
LAMA4	laminin subunit alpha 4 [Source:HGNC Symbol;Acc:HGNC:6484]	1800	4.26923	0.279823	Yes	4.94	62.66
ITGA5	integrin subunit alpha 5 [Source:HGNC Symbol;Acc:HGNC:6141]	1809	4.26515	0.297113	Yes	0.97	12.23
ITGA6	integrin subunit alpha 6 [Source:HGNC Symbol;Acc:HGNC:6142]	1847	4.24985	0.312601	Yes	5.14	63.38
GP1BB	glycoprotein Ib platelet subunit beta [Source:HGNC Symbol;Acc:HGNC:4440]	1950	4.20635	0.324009	Yes	0	5.3
ITGA4	integrin subunit alpha 4 [Source:HGNC Symbol;Acc:HGNC:6140]	2023	4.17933	0.337104	Yes	0.54	6.04
LAMB1	laminin subunit beta 1 [Source:HGNC Symbol;Acc:HGNC:6486]	2183	4.12281	0.344745	Yes	2.3	23.92
COL4A6	collagen type IV alpha 6 chain [Source:HGNC Symbol;Acc:HGNC:2208]	2271	4.09091	0.356572	Yes	0.01	0.1
VWF	von Willebrand factor [Source:HGNC Symbol;Acc:HGNC:12726]	2325	4.06931	0.370348	Yes	22.6	220.23
ITGA3	integrin subunit alpha 3 [Source:HGNC Symbol;Acc:HGNC:6139]	2347	4.06077	0.386007	Yes	0.51	4.92
COL6A3	collagen type VI alpha 3 chain [Source:HGNC Symbol;Acc:HGNC:2213]	2395	4.037	0.400008	Yes	6.09	57.15
HMMR	hyaluronan mediated motility receptor [Source:HGNC Symbol;Acc:HGNC:5012]	2439	4.01961	0.414177	Yes	0.05	0.46
TNC	tenascin C [Source:HGNC Symbol;Acc:HGNC:5318]	2568	3.96714	0.423029	Yes	0.44	3.82
TNXB	tenascin XB [Source:HGNC Symbol;Acc:HGNC:11976]	2832	3.84422	0.423272	Yes	1.15	8.8
COL6A6	collagen type VI alpha 6 chain [Source:HGNC Symbol;Acc:HGNC:27023]	3057	3.75	0.425462	Yes	0.01	0.07
COL1A1	collagen type I alpha 1 chain [Source:HGNC Symbol;Acc:HGNC:2197]	3236	3.67014	0.430078	Yes	12.49	81.43
LAMC3	laminin subunit gamma 3 [Source:HGNC Symbol;Acc:HGNC:6494]	3276	3.64865	0.442941	Yes	0.05	0.32
LAMC1	laminin subunit gamma 1 [Source:HGNC Symbol;Acc:HGNC:6492]	3336	3.6186	0.454479	Yes	12.51	78.05
ITGA8	integrin subunit alpha 8 [Source:HGNC Symbol;Acc:HGNC:6144]	3390	3.59155	0.466264	Yes	0.1	0.61
SDC4	syndecan 4 [Source:HGNC Symbol;Acc:HGNC:10661]	3680	3.46886	0.463385	Yes	7.08	39.16
SPP1	secreted phosphoprotein 1 [Source:HGNC Symbol;Acc:HGNC:11255]	3756	3.43173	0.473185	Yes	1.7	9.14
LAMB2	laminin subunit beta 2 [Source:HGNC Symbol;Acc:HGNC:6487]	3964	3.32959	0.474643	Yes	15.6	77.79
HSPG2	heparan sulfate proteoglycan 2 [Source:HGNC Symbol;Acc:HGNC:5273]	4024	3.30064	0.484856	Yes	22.7	110.88
COL5A2	collagen type V alpha 2 chain [Source:HGNC Symbol;Acc:HGNC:2210]	4049	3.28656	0.49711	Yes	2.32	11.22
LAMA2	laminin subunit alpha 2 [Source:HGNC Symbol;Acc:HGNC:6482]	4136	3.24096	0.505455	Yes	2.92	13.68
COL1A2	collagen type I alpha 2 chain [Source:HGNC Symbol;Acc:HGNC:2198]	4280	3.18049	0.51013	Yes	22.4	100.71
IBSP	integrin binding sialoprotein [Source:HGNC Symbol;Acc:HGNC:5341]	4306	3.16568	0.521821	Yes	0.31	1.38
ITGA11	integrin subunit alpha 11 [Source:HGNC Symbol;Acc:HGNC:6136]	4383	3.13187	0.530311	Yes	0.34	1.48
FN1	fibronectin 1 [Source:HGNC Symbol;Acc:HGNC:3778]	4414	3.12401	0.541528	Yes	2.36	10.22
ITGB6	integrin subunit beta 6 [Source:HGNC Symbol;Acc:HGNC:6161]	4505	3.08561	0.548986	Yes	4.07	17.19
ITGA7	integrin subunit alpha 7 [Source:HGNC Symbol;Acc:HGNC:6143]	4750	2.96816	0.546719	Yes	11.36	44.55
COL3A1	collagen type III alpha 1 chain [Source:HGNC Symbol;Acc:HGNC:2201]	4835	2.92379	0.553863	Yes	9.59	36.6
CD44	CD44 molecule (Indian blood group) [Source:HGNC Symbol;Acc:HGNC:1681]	4970	2.85498	0.557722	Yes	0.71	2.6
COL6A2	collagen type VI alpha 2 chain [Source:HGNC Symbol;Acc:HGNC:2212]	5169	2.7522	0.557314	Yes	6.64	22.9
COL4A2	collagen type IV alpha 2 chain [Source:HGNC Symbol;Acc:HGNC:2203]	5210	2.73131	0.566294	Yes	5.37	18.3
SDC3	syndecan 3 [Source:HGNC Symbol;Acc:HGNC:10660]	5220	2.72672	0.577115	Yes	1.88	6.39
THBS2	thrombospondin 2 [Source:HGNC Symbol;Acc:HGNC:11786]	5279	2.68844	0.584838	Yes	0.92	3.06
COMP	cartilage oligomeric matrix protein [Source:HGNC Symbol;Acc:HGNC:2227]	5414	2.61975	0.587716	Yes	4.82	15.43
ITGAV	integrin subunit alpha V [Source:HGNC Symbol;Acc:HGNC:6150]	6107	2.26295	0.555643	No	9.93	26.35
COL4A4	collagen type IV alpha 4 chain [Source:HGNC Symbol;Acc:HGNC:2206]	6849	1.85535	0.518933	No	0	0.59
COL4A1	collagen type IV alpha 1 chain [Source:HGNC Symbol;Acc:HGNC:2202]	7267	1.63922	0.500753	No	6.53	12.9
DAG1	dystroglycan 1 [Source:HGNC Symbol;Acc:HGNC:2666]	7696	1.38686	0.480863	No	2.97	5.25
SDC2	syndecan 2 [Source:HGNC Symbol;Acc:HGNC:10659]	8177	1.09952	0.456657	No	2.43	3.8
COL6A1	collagen type VI alpha 1 chain [Source:HGNC Symbol;Acc:HGNC:2211]	8338	1.00429	0.451245	No	5.59	8.4
CD47	CD47 molecule [Source:HGNC Symbol;Acc:HGNC:1682]	8503	0.916718	0.445229	No	6.57	9.52
GP1BA	glycoprotein Ib platelet subunit alpha [Source:HGNC Symbol;Acc:HGNC:4439]	8703	0.8	0.436627	No	1.05	1.45
ITGA2	integrin subunit alpha 2 [Source:HGNC Symbol;Acc:HGNC:6137]	9440	0.37037	0.39403	No	0	0.08
SV2A	synaptic vesicle glycoprotein 2A [Source:HGNC Symbol;Acc:HGNC:20566]	9560	0.283019	0.388072	No	0	0.06
TNN	tenascin N [Source:HGNC Symbol;Acc:HGNC:22942]	9798	0.145631	0.374465	No	0	0.03
GP6	glycoprotein VI platelet [Source:HGNC Symbol;Acc:HGNC:14388]	10505	0	0.332124	No	0	0
GP5	glycoprotein V platelet [Source:HGNC Symbol;Acc:HGNC:4443]	10506	0	0.332124	No	0	0
GP9	glycoprotein IX platelet [Source:HGNC Symbol;Acc:HGNC:4444]	10508	0	0.332064	No	0	0
LAMA1	laminin subunit alpha 1 [Source:HGNC Symbol;Acc:HGNC:6481]	11078	0	0.297939	No	0	0
TNR	tenascin R [Source:HGNC Symbol;Acc:HGNC:11953]	11770	0	0.256497	No	0	0
THBS4	thrombospondin 4 [Source:HGNC Symbol;Acc:HGNC:11788]	13261	-0.0353797	0.167284	No	26.33	25.96
SV2B	synaptic vesicle glycoprotein 2B [Source:HGNC Symbol;Acc:HGNC:16874]	13277	-0.049505	0.166591	No	0.01	0
CD36	CD36 molecule [Source:HGNC Symbol;Acc:HGNC:1663]	13362	-0.0891411	0.161924	No	25.12	24.24
SV2C	synaptic vesicle glycoprotein 2C [Source:HGNC Symbol;Acc:HGNC:30670]	14046	-0.327103	0.122325	No	0.07	0
SDC1	syndecan 1 [Source:HGNC Symbol;Acc:HGNC:10658]	14117	-0.369128	0.119665	No	0.8	0.69
VTN	vitronectin [Source:HGNC Symbol;Acc:HGNC:12724]	14796	-0.789474	0.082292	No	15.4	11.2
LAMB3	laminin subunit beta 3 [Source:HGNC Symbol;Acc:HGNC:6490]	14941	-0.909091	0.0774434	No	0.13	0.09
CHAD	chondroadherin [Source:HGNC Symbol;Acc:HGNC:1909]	15275	-1.20997	0.0625135	No	11.83	7.22
ITGB5	integrin subunit beta 5 [Source:HGNC Symbol;Acc:HGNC:6160]	15477	-1.43885	0.0564536	No	19.69	10.89
ITGB1	integrin subunit beta 1 [Source:HGNC Symbol;Acc:HGNC:6153]	15825	-1.83213	0.0432762	No	28.49	13.21
LAMC2	laminin subunit gamma 2 [Source:HGNC Symbol;Acc:HGNC:6493]	16409	-3	0.0208108	No	0.2	0.05

## Sheet: motor endplate gene set
Probe	Gene description (Source dataset)	Rank in gene list	Rank metric score	Running ES	Core enrichement	Input RNA (TPM)	IP RNA (TPM)
UTRN	utrophin [Source:HGNC Symbol;Acc:HGNC:12635]	32	4.96584	0.0911185	Yes	1.97	574.66
TTN	titin [Source:HGNC Symbol;Acc:HGNC:12403]	75	4.92732	0.180934	Yes	31.4	4288.94
MYO9A	myosin IXA [Source:HGNC Symbol;Acc:HGNC:7608]	209	4.8694	0.264372	Yes	0.28	21.16
LAMA5	laminin subunit alpha 5 [Source:HGNC Symbol;Acc:HGNC:6485]	349	4.81475	0.346437	Yes	4.75	251.66
PREPL	prolyl endopeptidase like [Source:HGNC Symbol;Acc:HGNC:30228]	938	4.58896	0.398157	Yes	0.73	17.03
LRP4	LDL receptor related protein 4 [Source:HGNC Symbol;Acc:HGNC:6696]	964	4.57627	0.482388	Yes	0.55	12.43
COL13A1	collagen type XIII alpha 1 chain [Source:HGNC Symbol;Acc:HGNC:2190]	1879	4.24901	0.508779	Yes	0.19	2.34
PLEC	plectin [Source:HGNC Symbol;Acc:HGNC:9069]	2209	4.12617	0.566899	Yes	12.37	129.19
MUSK	muscle associated receptor tyrosine kinase [Source:HGNC Symbol;Acc:HGNC:7525]	3677	3.49162	0.546941	Yes	0.27	1.52
LAMB2	laminin subunit beta 2 [Source:HGNC Symbol;Acc:HGNC:6487]	4025	3.32959	0.589099	Yes	15.6	77.79
CHRNE	cholinergic receptor nicotinic epsilon subunit [Source:HGNC Symbol;Acc:HGNC:1966]	7248	1.70844	0.433664	No	11.82	24.09
CHRNB1	cholinergic receptor nicotinic beta 1 subunit [Source:HGNC Symbol;Acc:HGNC:1961]	7601	1.50013	0.441276	No	13.45	24.98
DOK7	docking protein 7 [Source:HGNC Symbol;Acc:HGNC:26594]	8308	1.10345	0.420869	No	3.39	5.31
COLQ	collagen like tail subunit of asymmetric acetylcholinesterase [Source:HGNC Symbol;Acc:HGNC:2226]	8527	0.986278	0.426655	No	2.34	3.49
CHRNA1	cholinergic receptor nicotinic alpha 1 subunit [Source:HGNC Symbol;Acc:HGNC:1955]	15490	-1.02941	0.0409505	No	3.69	2.43
CHRND	cholinergic receptor nicotinic delta subunit [Source:HGNC Symbol;Acc:HGNC:1965]	16017	-1.56934	0.0397374	No	0.9	0.47
RAPSN	receptor associated protein of the synapse [Source:HGNC Symbol;Acc:HGNC:9863]	16020	-1.57161	0.0690477	No	20.97	10.94

## Sheet: diacylglycerol kinases
Probe	Gene description (Source dataset)	Rank in gene list	Rank metric score	Running ES	Core enrichement	Input RNA (TPM)	IP RNA (TPM)
DGKH	diacylglycerol kinase eta [Source:HGNC Symbol;Acc:HGNC:2854]	72	4.92918	0.156624	Yes	0.05	7.01
DGKQ	diacylglycerol kinase theta [Source:HGNC Symbol;Acc:HGNC:2856]	797	4.64455	0.266051	Yes	0.45	12.21
DGKZ	diacylglycerol kinase zeta [Source:HGNC Symbol;Acc:HGNC:2857]	805	4.64267	0.417108	Yes	9.56	257.98
DGKD	diacylglycerol kinase delta [Source:HGNC Symbol;Acc:HGNC:2851]	1865	4.25443	0.494328	Yes	3.66	45.43
DGKA	diacylglycerol kinase alpha [Source:HGNC Symbol;Acc:HGNC:2849]	1881	4.24812	0.632048	Yes	1.4	17.22
DGKE	diacylglycerol kinase epsilon [Source:HGNC Symbol;Acc:HGNC:2852]	2025	4.18963	0.760417	Yes	0.5	5.67
DGKB	diacylglycerol kinase beta [Source:HGNC Symbol;Acc:HGNC:2850]	6652	2.02381	0.557457	No	0	0.68
DGKG	diacylglycerol kinase gamma [Source:HGNC Symbol;Acc:HGNC:2853]	7418	1.62162	0.565879	No	0	0.48
DGKK	diacylglycerol kinase kappa [Source:HGNC Symbol;Acc:HGNC:32395]	13509	0	0.211768	No	0	0
DGKI	diacylglycerol kinase iota [Source:HGNC Symbol;Acc:HGNC:2855]	13836	-0.0980392	0.196011	No	0.02	0

## Sheet: phosphatidylinositol kinases
Probe	Gene description (Source dataset)	Rank in gene list	Rank metric score	Running ES	Core enrichement	Input RNA (TPM)	IP RNA (TPM)
PIKFYVE	phosphoinositide kinase, FYVE-type zinc finger containing [Source:HGNC Symbol;Acc:HGNC:23785]	218	4.86667	0.0414941	Yes	0.03	2.22
PIK3R5	phosphoinositide-3-kinase regulatory subunit 5 [Source:HGNC Symbol;Acc:HGNC:30035]	807	4.64143	0.0589426	Yes	0.09	2.42
PIK3C2B	phosphatidylinositol-4-phosphate 3-kinase catalytic subunit type 2 beta [Source:HGNC Symbol;Acc:HGNC:8972]	1244	4.48849	0.0835363	Yes	0.8	14.84
PIK3R6	phosphoinositide-3-kinase regulatory subunit 6 [Source:HGNC Symbol;Acc:HGNC:27101]	1278	4.47596	0.131449	Yes	1.09	19.71
PI4KA	phosphatidylinositol 4-kinase alpha [Source:HGNC Symbol;Acc:HGNC:8983]	1497	4.39499	0.167692	Yes	9.42	146.28
PIK3R1	phosphoinositide-3-kinase regulatory subunit 1 [Source:HGNC Symbol;Acc:HGNC:8979]	1882	4.24726	0.192627	Yes	1.58	19.41
PIK3C2A	phosphatidylinositol-4-phosphate 3-kinase catalytic subunit type 2 alpha [Source:HGNC Symbol;Acc:HGNC:8971]	1901	4.24012	0.238787	Yes	0.25	3.04
PIK3CD	phosphatidylinositol-4,5-bisphosphate 3-kinase catalytic subunit delta [Source:HGNC Symbol;Acc:HGNC:8977]	1915	4.23186	0.285147	Yes	1.63	19.59
PIP5K1A	phosphatidylinositol-4-phosphate 5-kinase type 1 alpha [Source:HGNC Symbol;Acc:HGNC:8994]	2007	4.19655	0.326573	Yes	4.01	45.9
PI4K2B	phosphatidylinositol 4-kinase type 2 beta [Source:HGNC Symbol;Acc:HGNC:18215]	2023	4.19003	0.37235	Yes	0.26	2.95
PIP5K1B	phosphatidylinositol-4-phosphate 5-kinase type 1 beta [Source:HGNC Symbol;Acc:HGNC:8995]	2235	4.11765	0.405912	Yes	0.03	0.31
PDPK1	3-phosphoinositide dependent protein kinase 1 [Source:HGNC Symbol;Acc:HGNC:8816]	2577	3.98084	0.430384	Yes	1.33	11.72
PIK3R3	phosphoinositide-3-kinase regulatory subunit 3 [Source:HGNC Symbol;Acc:HGNC:8981]	2758	3.91182	0.463459	Yes	0.58	4.75
PIP4K2A	phosphatidylinositol-5-phosphate 4-kinase type 2 alpha [Source:HGNC Symbol;Acc:HGNC:8997]	2899	3.83549	0.498013	Yes	0.63	4.78
PIK3CB	phosphatidylinositol-4,5-bisphosphate 3-kinase catalytic subunit beta [Source:HGNC Symbol;Acc:HGNC:8976]	3342	3.63793	0.512787	Yes	0.79	5.01
PIK3CA	phosphatidylinositol-4,5-bisphosphate 3-kinase catalytic subunit alpha [Source:HGNC Symbol;Acc:HGNC:8975]	3389	3.61668	0.550377	Yes	4.28	26.66
PIK3C3	phosphatidylinositol 3-kinase catalytic subunit type 3 [Source:HGNC Symbol;Acc:HGNC:8974]	3926	3.37951	0.556802	Yes	3.1	16.03
PIK3R4	phosphoinositide-3-kinase regulatory subunit 4 [Source:HGNC Symbol;Acc:HGNC:8982]	4082	3.30111	0.584533	Yes	1.23	6.01
PIP4K2C	phosphatidylinositol-5-phosphate 4-kinase type 2 gamma [Source:HGNC Symbol;Acc:HGNC:23786]	4410	3.15171	0.600588	Yes	3.46	15.26
PIK3IP1	phosphoinositide-3-kinase interacting protein 1 [Source:HGNC Symbol;Acc:HGNC:24942]	5624	2.55303	0.558403	No	10.96	33.83
PI4K2A	phosphatidylinositol 4-kinase type 2 alpha [Source:HGNC Symbol;Acc:HGNC:30031]	5708	2.51511	0.581574	No	3.7	11.19
PIK3R2	phosphoinositide-3-kinase regulatory subunit 2 [Source:HGNC Symbol;Acc:HGNC:8980]	6707	1.99074	0.545644	No	3.25	7.55
PIP4K2B	phosphatidylinositol-5-phosphate 4-kinase type 2 beta [Source:HGNC Symbol;Acc:HGNC:8998]	9339	0.502431	0.398086	No	5.55	6.79
PIP5K1C	phosphatidylinositol-4-phosphate 5-kinase type 1 gamma [Source:HGNC Symbol;Acc:HGNC:8996]	9464	0.446293	0.395837	No	3.01	3.6
PIK3AP1	phosphoinositide-3-kinase adaptor protein 1 [Source:HGNC Symbol;Acc:HGNC:30034]	12378	0	0.22627	No	0	0
PIK3C2G	phosphatidylinositol-4-phosphate 3-kinase catalytic subunit type 2 gamma [Source:HGNC Symbol;Acc:HGNC:8973]	12491	0	0.21975	No	0	0
PIP5KL1	phosphatidylinositol-4-phosphate 5-kinase like 1 [Source:HGNC Symbol;Acc:HGNC:28711]	12493	0	0.219692	No	0	0
PIK3CG	phosphatidylinositol-4,5-bisphosphate 3-kinase catalytic subunit gamma [Source:HGNC Symbol;Acc:HGNC:8978]	13656	-0.049505	0.152602	No	0.01	0
PI4KB	phosphatidylinositol 4-kinase beta [Source:HGNC Symbol;Acc:HGNC:8984]	17203	-4.85423	0.000232941	No	3.38	0.05

## Sheet: phospholipases
Probe	Gene description (Source dataset)	Rank in gene list	Rank metric score	Running ES	Core enrichement	Input RNA (TPM)	IP RNA (TPM)
PLCB1	phospholipase C beta 1 [Source:HGNC Symbol;Acc:HGNC:15917]	160	4.89292	0.0323247	Yes	0.13	12.01
PLA2R1	phospholipase A2 receptor 1 [Source:HGNC Symbol;Acc:HGNC:9042]	452	4.77093	0.0559738	Yes	0.26	11.09
PLCB2	phospholipase C beta 2 [Source:HGNC Symbol;Acc:HGNC:9055]	520	4.7479	0.0924858	Yes	0.03	1.16
PNPLA6	patatin like phospholipase domain containing 6 [Source:HGNC Symbol;Acc:HGNC:16268]	629	4.70367	0.126231	Yes	0.67	21.94
PLCB4	phospholipase C beta 4 [Source:HGNC Symbol;Acc:HGNC:9059]	706	4.68022	0.161642	Yes	3.24	98.08
PLCG1	phospholipase C gamma 1 [Source:HGNC Symbol;Acc:HGNC:9065]	839	4.62921	0.193354	Yes	1.96	50.9
PLCE1	phospholipase C epsilon 1 [Source:HGNC Symbol;Acc:HGNC:17175]	944	4.58621	0.226333	Yes	0.12	2.78
PLCG2	phospholipase C gamma 2 [Source:HGNC Symbol;Acc:HGNC:9066]	1042	4.55285	0.259436	Yes	0.11	2.35
PLD1	phospholipase D1 [Source:HGNC Symbol;Acc:HGNC:9067]	1378	4.44268	0.277725	Yes	0.35	5.93
PLCD3	phospholipase C delta 3 [Source:HGNC Symbol;Acc:HGNC:9061]	1515	4.38532	0.307128	Yes	1.34	20.46
PLD2	phospholipase D2 [Source:HGNC Symbol;Acc:HGNC:9068]	1644	4.33827	0.336597	Yes	1.34	18.91
PLCD1	phospholipase C delta 1 [Source:HGNC Symbol;Acc:HGNC:9060]	1790	4.28503	0.364621	Yes	2.23	28.96
PLCD4	phospholipase C delta 4 [Source:HGNC Symbol;Acc:HGNC:9062]	1928	4.22869	0.392632	Yes	13.71	164.04
PNPLA7	patatin like phospholipase domain containing 7 [Source:HGNC Symbol;Acc:HGNC:24768]	2028	4.18933	0.422524	Yes	9.15	103.72
PLCXD2	phosphatidylinositol specific phospholipase C X domain containing 2 [Source:HGNC Symbol;Acc:HGNC:26462]	2100	4.16667	0.453855	Yes	0.02	0.22
PLCB3	phospholipase C beta 3 [Source:HGNC Symbol;Acc:HGNC:9056]	2108	4.16446	0.488898	Yes	1.58	17.33
PLD4	phospholipase D family member 4 [Source:HGNC Symbol;Acc:HGNC:23792]	2574	3.98164	0.495684	Yes	0.61	5.38
PNPLA3	patatin like phospholipase domain containing 3 [Source:HGNC Symbol;Acc:HGNC:18590]	3484	3.57143	0.473093	Yes	0.25	1.5
PLA2G4E	phospholipase A2 group IVE [Source:HGNC Symbol;Acc:HGNC:24791]	3683	3.48946	0.491255	Yes	2.58	14.5
PLD5	phospholipase D family member 5 [Source:HGNC Symbol;Acc:HGNC:26879]	4043	3.32	0.498588	Yes	0.21	1.04
PLA2G4A	phospholipase A2 group IVA [Source:HGNC Symbol;Acc:HGNC:9035]	5000	2.87879	0.467361	No	0.07	0.26
PLA2G2D	phospholipase A2 group IID [Source:HGNC Symbol;Acc:HGNC:9033]	5729	2.5	0.446202	No	0.03	0.09
PLA1A	phospholipase A1 member A [Source:HGNC Symbol;Acc:HGNC:17661]	6447	2.13775	0.4226	No	1.6	3.99
PLCL1	phospholipase C like 1 (inactive) [Source:HGNC Symbol;Acc:HGNC:9063]	6828	1.92308	0.416817	No	0.32	0.72
PLD3	phospholipase D family member 3 [Source:HGNC Symbol;Acc:HGNC:17158]	7309	1.67817	0.40312	No	8.66	17.41
PLA2G15	phospholipase A2 group XV [Source:HGNC Symbol;Acc:HGNC:17163]	7745	1.42487	0.389889	No	1.38	2.48
PLBD2	phospholipase B domain containing 2 [Source:HGNC Symbol;Acc:HGNC:27283]	8473	1.01249	0.356125	No	4.47	6.74
PLA2G6	phospholipase A2 group VI [Source:HGNC Symbol;Acc:HGNC:9039]	8518	0.99318	0.362015	No	4.7	7.03
PLD6	phospholipase D family member 6 [Source:HGNC Symbol;Acc:HGNC:30447]	8675	0.901639	0.360596	No	0	0.22
PNPLA8	patatin like phospholipase domain containing 8 [Source:HGNC Symbol;Acc:HGNC:28900]	8760	0.849659	0.362932	No	28.6	40.31
PLA2G3	phospholipase A2 group III [Source:HGNC Symbol;Acc:HGNC:17934]	8917	0.762712	0.36033	No	0	0.18
PLCXD1	phosphatidylinositol specific phospholipase C X domain containing 1 [Source:HGNC Symbol;Acc:HGNC:23148]	9114	0.652174	0.354455	No	0	0.15
PLA2G4F	phospholipase A2 group IVF [Source:HGNC Symbol;Acc:HGNC:27396]	9350	0.495495	0.344973	No	0	0.11
PLAA	phospholipase A2 activating protein [Source:HGNC Symbol;Acc:HGNC:9043]	9463	0.446389	0.342243	No	10.15	12.14
PLA2G12A	phospholipase A2 group XIIA [Source:HGNC Symbol;Acc:HGNC:18554]	9472	0.437751	0.345504	No	84.21	100.37
PLA2G10	phospholipase A2 group X [Source:HGNC Symbol;Acc:HGNC:9029]	10880	0	0.263477	No	0	0
PLA2G4D	phospholipase A2 group IVD [Source:HGNC Symbol;Acc:HGNC:30038]	10892	0	0.262836	No	0	0
PLA2G1B	phospholipase A2 group IB [Source:HGNC Symbol;Acc:HGNC:9030]	10897	0	0.262603	No	0	0
PLA2G2F	phospholipase A2 group IIF [Source:HGNC Symbol;Acc:HGNC:30040]	10900	0	0.262486	No	0	0
PLA2G2C	phospholipase A2 group IIC [Source:HGNC Symbol;Acc:HGNC:9032]	10902	0	0.262428	No	0	0
PNPLA5	patatin like phospholipase domain containing 5 [Source:HGNC Symbol;Acc:HGNC:24888]	12419	0	0.174047	No	0	0
PNPLA1	patatin like phospholipase domain containing 1 [Source:HGNC Symbol;Acc:HGNC:21246]	12420	0	0.174047	No	0	0
PLCH1	phospholipase C eta 1 [Source:HGNC Symbol;Acc:HGNC:29185]	13114	0	0.133646	No	0	0
PLCZ1	phospholipase C zeta 1 [Source:HGNC Symbol;Acc:HGNC:19218]	13210	0	0.128107	No	0	0
PLA2G4C	phospholipase A2 group IVC [Source:HGNC Symbol;Acc:HGNC:9037]	13754	-0.0980392	0.0972855	No	0.02	0
PLCXD3	phosphatidylinositol specific phospholipase C X domain containing 3 [Source:HGNC Symbol;Acc:HGNC:31822]	14124	-0.192308	0.0774103	No	0.04	0
PLCL2	phospholipase C like 2 [Source:HGNC Symbol;Acc:HGNC:9064]	14131	-0.198478	0.0787501	No	9.56	8.83
PLCH2	phospholipase C eta 2 [Source:HGNC Symbol;Acc:HGNC:29037]	14353	-0.283019	0.0682754	No	0.06	0
PLA2G12B	phospholipase A2 group XIIB [Source:HGNC Symbol;Acc:HGNC:18555]	14763	-0.495495	0.0486492	No	0.11	0
PLBD1	phospholipase B domain containing 1 [Source:HGNC Symbol;Acc:HGNC:26215]	14964	-0.624196	0.0423031	No	8.74	6.8
PLA2G7	phospholipase A2 group VII [Source:HGNC Symbol;Acc:HGNC:9040]	15416	-0.971676	0.024282	No	15.18	10.24
PLA2G2E	phospholipase A2 group IIE [Source:HGNC Symbol;Acc:HGNC:13414]	15813	-1.35036	0.0126911	No	0.37	0
PLB1	phospholipase B1 [Source:HGNC Symbol;Acc:HGNC:30041]	16410	-2.04453	-0.00465022	No	1.74	0.73
PLA2G5	phospholipase A2 group V [Source:HGNC Symbol;Acc:HGNC:9038]	16456	-2.12121	0.0107838	No	0.47	0.19
PNPLA2	patatin like phospholipase domain containing 2 [Source:HGNC Symbol;Acc:HGNC:30802]	17093	-3.86947	0.00664593	No	92.89	11.84

## Sheet: integrins
Probe	Gene description (Source dataset)	Rank in gene list	Rank metric score	Running ES	Core enrichement	Input RNA (TPM)	IP RNA (TPM)
ITGA2B	integrin subunit alpha 2b [Source:HGNC Symbol;Acc:HGNC:6138]	59	4.93901	0.0472086	Yes	0.25	40.74
ITGA10	integrin subunit alpha 10 [Source:HGNC Symbol;Acc:HGNC:6135]	250	4.85447	0.0859244	Yes	0.07	4.74
ITGB8	integrin subunit beta 8 [Source:HGNC Symbol;Acc:HGNC:6163]	348	4.81482	0.129647	Yes	0.01	0.53
ITGAL	integrin subunit alpha L [Source:HGNC Symbol;Acc:HGNC:6148]	391	4.8	0.17642	Yes	0.04	1.96
ITGB3	integrin subunit beta 3 [Source:HGNC Symbol;Acc:HGNC:6156]	468	4.76608	0.220866	Yes	0.08	3.34
ITGB7	integrin subunit beta 7 [Source:HGNC Symbol;Acc:HGNC:6162]	555	4.73384	0.264399	Yes	0.21	7.68
ITGB2	integrin subunit beta 2 [Source:HGNC Symbol;Acc:HGNC:6155]	636	4.70297	0.307965	Yes	0.09	2.94
ITGAM	integrin subunit alpha M [Source:HGNC Symbol;Acc:HGNC:6149]	795	4.64516	0.346397	Yes	0.11	2.99
ITGB4	integrin subunit beta 4 [Source:HGNC Symbol;Acc:HGNC:6158]	908	4.60317	0.387077	Yes	0.35	8.47
ITGA1	integrin subunit alpha 1 [Source:HGNC Symbol;Acc:HGNC:6134]	1007	4.56318	0.428162	Yes	0.28	6.13
ITGA9	integrin subunit alpha 9 [Source:HGNC Symbol;Acc:HGNC:6145]	1135	4.52381	0.467155	Yes	0.14	2.8
ITGA5	integrin subunit alpha 5 [Source:HGNC Symbol;Acc:HGNC:6141]	1839	4.26515	0.469964	Yes	0.97	12.23
ITGA6	integrin subunit alpha 6 [Source:HGNC Symbol;Acc:HGNC:6142]	1877	4.24985	0.511387	Yes	5.14	63.38
ITGAX	integrin subunit alpha X [Source:HGNC Symbol;Acc:HGNC:6152]	1926	4.23077	0.551974	Yes	0.02	0.24
ITGA4	integrin subunit alpha 4 [Source:HGNC Symbol;Acc:HGNC:6140]	2055	4.17933	0.587376	Yes	0.54	6.04
ITGA3	integrin subunit alpha 3 [Source:HGNC Symbol;Acc:HGNC:6139]	2385	4.06077	0.609862	Yes	0.51	4.92
ITGA8	integrin subunit alpha 8 [Source:HGNC Symbol;Acc:HGNC:6144]	3439	3.59155	0.585389	No	0.1	0.61
ITGA11	integrin subunit alpha 11 [Source:HGNC Symbol;Acc:HGNC:6136]	4450	3.13187	0.558706	No	0.34	1.48
ITGB6	integrin subunit beta 6 [Source:HGNC Symbol;Acc:HGNC:6161]	4570	3.08561	0.583418	No	4.07	17.19
ITGA7	integrin subunit alpha 7 [Source:HGNC Symbol;Acc:HGNC:6143]	4820	2.96816	0.599357	No	11.36	44.55
ITGAV	integrin subunit alpha V [Source:HGNC Symbol;Acc:HGNC:6150]	6213	2.26295	0.541527	No	9.93	26.35
ITGB1BP2	integrin subunit beta 1 binding protein 2 [Source:HGNC Symbol;Acc:HGNC:6154]	6813	1.93531	0.526501	No	143.93	325.71
ITGB3BP	integrin subunit beta 3 binding protein [Source:HGNC Symbol;Acc:HGNC:6157]	8060	1.25101	0.466794	No	4.66	7.77
ITGB1BP1	integrin subunit beta 1 binding protein 1 [Source:HGNC Symbol;Acc:HGNC:23927]	8144	1.21079	0.474377	No	16.79	27.52
ITGBL1	integrin subunit beta like 1 [Source:HGNC Symbol;Acc:HGNC:6164]	8311	1.10169	0.47601	No	1.15	1.8
ITGA2	integrin subunit alpha 2 [Source:HGNC Symbol;Acc:HGNC:6137]	9601	0.37037	0.40477	No	0	0.08
ITGAD	integrin subunit alpha D [Source:HGNC Symbol;Acc:HGNC:6146]	13263	0	0.191648	No	0	0
ITGAE	integrin subunit alpha E [Source:HGNC Symbol;Acc:HGNC:6147]	14616	-0.412844	0.117176	No	0.09	0
ITGB5	integrin subunit beta 5 [Source:HGNC Symbol;Acc:HGNC:6160]	15895	-1.43885	0.0575323	No	19.69	10.89
ITGB1	integrin subunit beta 1 [Source:HGNC Symbol;Acc:HGNC:6153]	16247	-1.83213	0.0558854	No	28.49	13.21

## Sheet: laminins
Probe	Gene description (Source dataset)	Rank in gene list	Rank metric score	Running ES	Core enrichement	Input RNA (TPM)	IP RNA (TPM)
LAMA5	laminin subunit alpha 5 [Source:HGNC Symbol;Acc:HGNC:6485]	349	4.81475	0.115081	Yes	4.75	251.66
LAMA3	laminin subunit alpha 3 [Source:HGNC Symbol;Acc:HGNC:6483]	881	4.6124	0.213889	Yes	0.05	1.24
LAMA4	laminin subunit alpha 4 [Source:HGNC Symbol;Acc:HGNC:6484]	1830	4.26923	0.278799	Yes	4.94	62.66
LAMB1	laminin subunit beta 1 [Source:HGNC Symbol;Acc:HGNC:6486]	2219	4.12281	0.372157	Yes	2.3	23.92
LAMC3	laminin subunit gamma 3 [Source:HGNC Symbol;Acc:HGNC:6494]	3324	3.64865	0.410547	Yes	0.05	0.32
LAMC1	laminin subunit gamma 1 [Source:HGNC Symbol;Acc:HGNC:6492]	3384	3.6186	0.50886	Yes	12.51	78.05
LAMB2	laminin subunit beta 2 [Source:HGNC Symbol;Acc:HGNC:6487]	4025	3.32959	0.565261	Yes	15.6	77.79
LAMA2	laminin subunit alpha 2 [Source:HGNC Symbol;Acc:HGNC:6482]	4197	3.24096	0.646442	Yes	2.92	13.68
LAMA1	laminin subunit alpha 1 [Source:HGNC Symbol;Acc:HGNC:6481]	11311	0	0.232824	No	0	0
LAMB3	laminin subunit beta 3 [Source:HGNC Symbol;Acc:HGNC:6490]	15340	-0.909091	0.0241572	No	0.13	0.09
LAMC2	laminin subunit gamma 2 [Source:HGNC Symbol;Acc:HGNC:6493]	16852	-3	0.0206431	No	0.2	0.05
